# Supplementary material for: Novel roles of LSECtin in gastric cancer cell adhesion, migration, invasion, and lymphatic metastasis
Source: PubMed Central journal article supplement (PMC9276708; doi:10.1038/s41419-022-05026-x), 2022-07-11
Supplement: 41419_2022_5026_MOESM1_ESM.pdf [file 41419_2022_5026_MOESM1_ESM.pdf]

# 1 **Supplementary information**

## 2 **Supplementary file 1: Supplemental Materials and Methods**

### 3 **Genomic DNA and RNA extraction**

4 Genomic DNA (gDNA) was extracted from cells using an Easypure™ Genomic DNA kit  
5 (TransGen Biotech, Beijing, China). Total RNA was extracted from cultured cells using  
6 TRIZOL reagent (TaKaRa, Tokyo, Japan), row RNA concentration was measured by  
7 NanoDrop 2000 (Thermo Fisher Scientific, Waltham, MA, USA)

8

### 9 **Quantitative real-time PCR (qPCR)**

10 RNA was reverse transcribed into cDNA for circRNA, mRNA or miRNA by using random  
11 (TaKaRa, Japan), oligo(dT)18 primers (Thermo Fisher Scientific) or stem-loop primers,  
12 respectively. Primers are listed in Supplementary file Table S1. q-PCR analyses were  
13 performed with SuperReal PreMix Plus (TIANGEN) or miRNA Universal SYBR qPCR  
14 Master Mix (vazyme, Nanjing, China) on the Thermal Cycler Dice Real-Time System  
15 (TaKaRa). GAPDH or U6 was used as the internal reference, the  $2^{-\Delta\Delta C_t}$  method was adopted  
16 to calculate the relative expression of target genes.

17

### 18 **Western blot analysis**

19 The protein was extracted from cultured cells using a total protein extraction kit (KeyGen,  
20 Jiangsu, China) and the protein concentration was measured via BCA Protein Assay Kit  
21 (Beyotime, China) or (Sevenbio, Beijing, China). Protein was electrophoresed in 8% SDS  
22 polyacrylamide gels, transferred onto 0.22  $\mu$ m nitrocellulose membranes (Pall Corporation,  
23 New York, USA). The membranes were then incubated with assigned primary antibodies and

24 corresponding secondary antibodies. Signals were detected with electrochemical  
25 luminescence reagent (Advansta, USA).  $\beta$ -actin (1:500, ZSGB-BIO) was used as loading  
26 control, anti-STAT5A (1:500) was purchased from Elabscience (Wuhan, China), anti-STAT1  
27 (1:500), Anti-STAT3 (1:10000) were purchased from BD Biosciences. Anti-FN1(1:1500) was  
28 purchased from Proteintech (Wuhan, China), Anti-CHD4(1:10000) was purchased from  
29 Abcam (Cambridge, MA, USA). Anti-rabbit IgG (1:2000, ZSGB-BIO) and anti-mouse IgG  
30 (1:2000, ZSGB-BIO) HRP-conjugated secondary antibodies were used.

31

### 32 **Colony formation assay**

33 GC cells with the recombinant LSECTin protein or with control IgG were seeded 1000 cells  
34 per well in six-well plates. All cell lines were cultured for 2 weeks, colonies were stained by  
35 0.5% crystal violet and counted under optical microscope (Olympus IX71, Tokyo, Japan).

36

### 37 **Wound healing assay**

38  $3 \times 10^5$  cells were seeded in 12-well plates and incubated overnight. A vertical scratch was  
39 produced using a 10  $\mu$ L pipette tip, then the plate was washed twice, and cultured in the  
40 serum-free medium. The scratch width as a migration index was observed and photographed  
41 under a microscope (Olympus) at 0 and 24 hours, measured by ImageJ software.

42

### 43 **CCK8 assay and 5-Ethynyl-2-deoxyuridine (EdU) assay**

44 The proliferation of cells was tested by the CCK8 assay following Cell Counting Kit 8 (MCE,  
45 Monmouth Junction, NJ, USA) manufacturer's instructions. Enzyme-labeling instrument was

46 used for the measurement of OD value at 450 nm wavelength at day 1, 2, 3, and 4. EdU assay  
47 kit (Beyotime) was applied to detect DNA synthesis, which could also reflect cell  
48 proliferation. hoechst 33342 was added for nuclear staining. EdU cells were photographed  
49 and counted under Olympus fluorescence microscopy.

50

#### 51 **Transwell assay**

52 The transwell assay (24-well, Corning, NY, USA) was used to measure the cell migration and  
53 invasion. Briefly,  $3 \times 10^5$  or  $4.0 \times 10^5$  cells with 200 ul serum-free medium were added to the  
54 upper chamber of migratory or invasion assay. The chamber pre-coated with Matrigel (BD  
55 Biosciences) was used for invasion assay. Cells were incubated for 24 h, then fixed, and next  
56 stained with 0.5% Crystal Violet Solution. The average value of cell counting was calculated  
57 from five different microscopic fields.

58

59

60

61

62

63

64

65

66

67

68

69 **Supplementary file 2: Table S1. Primers and probes used in the study.**

70

**Primer sequences for RT-PCR and qPCR**

| <b>Company</b> | <b>Gene</b>                     | <b>primer sequences</b>                                                                    |
|----------------|---------------------------------|--------------------------------------------------------------------------------------------|
| Takara         | LSEctin                         | F: 5'-GCCATGGACACCACCAGGTACAGC-3'<br>R: 5'-GACTCAGCAGTTGTGCCTTTTCTC-3'                     |
|                | $\beta$ -actin                  | F: 5'-ATCTGGCACCAAACACCTTCTACAATGAGCTGCG -3'<br>R: 5'-CGTCATACTCCTGCTTGCTGATCCACATCTGC -3' |
| genepharma     | hsa_circ_0097100                | F: 5'-CCAAACATCCAGCCACAAGA-3'<br>R: 5'-ACCCACTACTGTTGCCTGAA-3'                             |
|                | hsa_circ_0073244                | F: 5'-TCACTGCCTCCAGCATCTT-3'<br>R: 5'-TGTCTTCATTGGTGCCTTTC-3'                              |
|                | hsa_circ_0027966                | F: 5'-AGTCTGCTCAAGTTCTACTGCT-3'<br>R: 5'-TCAGAACCGCACAAACACTG-3'                           |
|                | hsa_circ_0056281                | F: 5'-CACCTGCCGACAGTGGTT-3'<br>R: 5'-CATTCAGTGCTTGGGATGTTT-3'                              |
|                | hsa_circ_0077417<br>(circFBXL4) | F: 5'-GCCTTGAATTGTCTTGCAGCCAC-3'<br>R: 5'-ATGCTGACATGTGACATTCTTTTACCTCT-3'                 |
| sangon         | STAT1                           | F: 5'-TGGATCAGCTGCAGAACTGG-3'<br>R: 5'-GAAGGTGCGGTCCCATAACA-3'                             |
|                | STAT3                           | F: 5'-GGAGCATCCTGAAGCTGACC-3'<br>R: 5'-GTAGGCGCCTCAGTCGTATC-3'                             |
|                | STAT5A                          | F: 5'-ACCTGTGGTTGTCATCGTCC-3'<br>R: 5'-TTTGTGACGGCAGGCAAATG-3'                             |
|                | FN1                             | F: 5'-GGTGACACTTATGAGCGTCCTAAA-3'<br>R: 5'-AACATGTAACCACCAGTCTCATGTG-3'                    |
|                | CHD4                            | F: 5'-ACATTGCCAAGGAGGACC-3'<br>R: 5'-CACTTCTGCATAGGGCTCAG-3'                               |
|                | YY1                             | F: 5'-AAGAAGTGGGAGCAGAAGCA-3'<br>R: 5'-CAACCACTGCTCATGGCAA-3'                              |
|                | AR                              | F: 5'-GGTTACACCAAAGGGCTAGAA -3'<br>R: 5'-GACTTGTAGAGAGACAGGGTAGA -3'                       |
|                | SP1                             | F: 5'-CCACCATGAGCGACCAAGAT -3'<br>R: 5'-AAGGCACCACCACCATTACC -3'                           |
|                | FBXL4                           | F: 5'-CTTATGGGACATGGTGGGATCAG-3'<br>R: 5'-AGCTGGTGGATTTGGGGAATAAG-3'                       |
|                | Divergent GAPDH-F               | F: 5'-GGCCTCCAAGGAGTAAGA-3'<br>R: 5'-GCCCAATACGACCAAATCA-3'                                |
|                | GAPDH                           | F: 5'-CCTCAAGATCATCAGCAAT-3'                                                               |

|                                                  |                                                                                          |
|--------------------------------------------------|------------------------------------------------------------------------------------------|
| hsa-miR-146a-5p<br>(Reverse Transcription)       | R: 5'-CCATCCACAGTCTTCTGGGT-3'<br>GTCGTATCCAGTGCAGGGTCCGAGGTATTTCGCAC<br>TGGATACGACAACCCA |
| hsa-miR-146a-5p<br>U6 (Reverse<br>Transcription) | F: 5'-CGCGTGAGAACTGAATTCCA-3'<br>AACGCTTCACGAATTTGCGT                                    |
| U6                                               | F: 5'-CTCGCTTCGGCAGCACA-3'<br>R: 5'-AACGCTTCACGAATTTGCGT                                 |

---

**Primer sequences for CHIP assay**

| Company | Gene          | primer sequences                                                        |
|---------|---------------|-------------------------------------------------------------------------|
| sangon  | FN1 Region A  | F: 5'- GGATTTCCAGGTATCCTTCCCTC-3'<br>R: 5'- TGACCCACACTCCAAATTGAAAGA-3' |
|         | FN1 Region B  | F: 5'- AGGACTGATGTGATGTGTTGCT-3'<br>R: 5'- ATTACAGAATGCCCCCTCCATC-3'    |
|         | FN1 Region C  | F: 5'- GGTGAACGTGGGAAAGGACA-3'<br>R: 5'- GGGAGCAAAGGGGAACAGAG-3'        |
|         | CHD4 Region A | F: 5'- GTGGAGTCTCTTAAGAAGGAAGGACA-3'<br>R: 5'- CGTGGTCCTTCTAGAGGCTGG-3' |
|         | CHD4 Region B | F: 5'- GCCGAGTGTCCGTTGTAGT-3'<br>R: 5'- ATAATAAGCACCCCTCGCAGCA-3'       |
|         | CHD4 Region C | F: 5'- AGGGAACAGATAGGAGATCATGT-3'<br>R: 5'- TGCCAAGGGAGAAGTCTGCT-3'     |

---

**Probe sequences for FISH assay**

| Company    | Gene             | primer sequences                                       |
|------------|------------------|--------------------------------------------------------|
| genepharma | hsa_circ_0077417 | 5'- CY3-CTGACATGTGACATTCTTTTACCTCTACTT<br>TTGTTTCG -3' |
|            | hsa-miR-146a-5p  | 5'- FAM-AACCCATGGAATTCAGTTCTCA -3'                     |

71

72

73

74

75

76

77

78

79 **Supplementary file 3: Table S2. Target sequences for knockdown and overexpression.**

80

| Company    | Gene                                                 | sequences                                                                            |
|------------|------------------------------------------------------|--------------------------------------------------------------------------------------|
| genepharma | overexpression LSECin,<br>transcript variant 8       | NM_198492.3                                                                          |
|            | Overexpression STAT1,<br>transcript variant $\alpha$ | NM_007315.4                                                                          |
|            | si-hsa_circ_0077417<br>(circFBXL4)                   | 5'- CAAAAGUAGAGGUAAAAGATT<br>UCUUUUACCUCUACUUUUGTT-3'                                |
|            | si-STAT1                                             | sense: 5'- CUCAUUCGUGGACGAGGUdTdT -3'<br>antisense: 5'- ACCUCGUCCACGGAAUGAGdTdT -3'  |
|            | si-NC-                                               | sense: 5'- UUCUCCGAACGUGUCACGUdTdT -3'<br>antisense: 5'- ACGUGACACGUUCGGAGAAdTdT -3' |
|            | miR-146a-5p mimics                                   | sense: 5'- UGAGAACUGAAUCCAUGGGUU -3'<br>antisense: 5'- CCCAUGGAAUUCAGUUCUCAUU -3'    |
|            | miR-146a-5p inhibitor                                | 5'-AACCCAUGGAAUUCAGUUCUCA-3'                                                         |
|            | miRNA-NC                                             | sense: 5'- UUCUCCGAACGUGUCACGUdTdT -3'<br>antisense: 5'- ACGUGACACGUUCGGAGAAdTdT -3' |

81

82

83

84

85

86

87

88

89

90

91

92

93

94 **Supplementary file 4: Table S3. Databases used in this study.**

95

| Dataset                           | Source                                                                                        |
|-----------------------------------|-----------------------------------------------------------------------------------------------|
| Genotype-Tissue Expression (GTEx) | <a href="https://www.gtexportal.org/">https://www.gtexportal.org/</a>                         |
| The Cancer Genome Atlas (TCGA)    | <a href="https://portal.gdc.cancer.gov">https://portal.gdc.cancer.gov</a>                     |
| The Human Protein Atlas           | <a href="https://www.proteinatlas.org/">https://www.proteinatlas.org/</a>                     |
| GDAC Firehose                     | <a href="http://gdac.broadinstitute.org/">http://gdac.broadinstitute.org/</a>                 |
| KM Plotter                        | <a href="http://kmplot.com/analysis">http://kmplot.com/analysis</a>                           |
| OmicsBean                         | <a href="http://www.omicsbean.cn/account_center/">http://www.omicsbean.cn/account_center/</a> |
| UCSC Genome Browser               | <a href="http://genome.ucsc.edu/">http://genome.ucsc.edu/</a>                                 |
| PROMO                             | <a href="http://alggen.lsi.upc.es/">http://alggen.lsi.upc.es/</a>                             |
| JASPAR                            | <a href="http://jaspar.genereg.net/">http://jaspar.genereg.net/</a>                           |
| miRanda                           | <a href="http://www.microrna.org">http://www.microrna.org</a>                                 |
| TargetScan                        | <a href="http://www.targetscan.org/">http://www.targetscan.org/</a>                           |
| Tarbase                           | <a href="http://microrna.gr/tarbase/">http://microrna.gr/tarbase/</a>                         |
| miRTarBase                        | <a href="http://mirtarbase.mbc.nctu.edu.tw/">http://mirtarbase.mbc.nctu.edu.tw/</a>           |
| Vienna RNA Web Services           | <a href="http://rna.tbi.univie.ac.at/">http://rna.tbi.univie.ac.at/</a>                       |

96

97

98

99

100

101

102

103

104

105

106

107

108

**Supplementary file 5: Table S4. Positive and negative transcriptional regulation by LSECin-reduced in MGC-803 cells**

109

| Symbol | RefSeq    | Description                                                         | p value  | Fold Regulation | Comments |
|--------|-----------|---------------------------------------------------------------------|----------|-----------------|----------|
| APC    | NM_000038 | Adenomatous polyposis coli                                          | 0.438053 | 1.437304        | B        |
| BRMS1  | NM_015399 | Breast cancer metastasis suppressor 1                               | 0.39819  | -1.3724         | OKAY     |
| CCL7   | NM_006273 | Chemokine (C-C motif) ligand 7                                      | 0.941716 | -1.11272        | C        |
| CD44   | NM_000610 | CD44 molecule (Indian blood group)                                  | 0.257056 | 1.150436        | OKAY     |
| CD82   | NM_002231 | CD82 molecule                                                       | 0.303211 | -1.28644        | OKAY     |
| CDH1   | NM_004360 | Cadherin 1, type 1, E-cadherin (epithelial)                         | 0.575858 | 1.134011        | OKAY     |
| CDH11  | NM_001797 | Cadherin 11, type 2, OB-cadherin (osteoblast)                       | 0.941716 | -1.11272        | C        |
| CDH6   | NM_004932 | Cadherin 6, type 2, K-cadherin (fetal kidney)                       | 0.941716 | -1.11272        | C        |
| CDKN2A | NM_000077 | Cyclin-dependent kinase inhibitor 2A (melanoma, p16, inhibits CDK4) | 0.444247 | -1.11085        | OKAY     |
| CHD4   | NM_001273 | Chromodomain helicase DNA binding protein 4                         | 0.006436 | 1.469298        | OKAY     |
| COL4A2 | NM_001846 | Collagen, type IV, alpha 2                                          | 0.767418 | -1.05624        | OKAY     |
| CST7   | NM_003650 | Cystatin F (leukocystatin)                                          | 0.653741 | 1.432535        | B        |
| CTBP1  | NM_001328 | C-terminal binding protein 1                                        | 0.531739 | -1.17941        | OKAY     |
| CTNNA1 | NM_001903 | Catenin (cadherin-associated protein), alpha 1, 102kDa              | 0.069541 | 1.314897        | OKAY     |
| CTSK   | NM_000396 | Cathepsin K                                                         | 0.032663 | -2.0814         | OKAY     |
| CTSL   | NM_001912 | Cathepsin L1                                                        | 0.54156  | -1.2385         | OKAY     |
| CXCL12 | NM_000609 | Chemokine (C-X-C motif) ligand 12                                   | 0.941716 | -1.11272        | C        |
| CXCR2  | NM_001557 | Chemokine (C-X-C motif) receptor 2                                  | 0.709487 | 1.068989        | OKAY     |
| CXCR4  | NM_003467 | Chemokine (C-X-C motif) receptor 4                                  | 0.434009 | 1.124785        | OKAY     |
| DENR   | NM_003677 | Density-regulated protein                                           | 0.351481 | 1.18624         | OKAY     |
| EPHB2  | NM_004442 | EPH receptor B2                                                     | 0.515991 | -1.09995        | OKAY     |
| ETV4   | NM_001986 | Ets variant 4                                                       | 0.02815  | -2.49706        | OKAY     |
| EWSR1  | NM_005243 | Ewing sarcoma breakpoint region 1                                   | 0.752024 | 1.121713        | OKAY     |



|         |           |                                                                                 |          |          |      |
|---------|-----------|---------------------------------------------------------------------------------|----------|----------|------|
| FAT1    | NM_005245 | FAT tumor suppressor homolog 1 (Drosophila)                                     | 0.419371 | 1.094797 | OKAY |
| FGFR4   | NM_002011 | Fibroblast growth factor receptor 4                                             | 0.430231 | 1.702411 | B    |
| FLT4    | NM_002020 | Fms-related tyrosine kinase 4                                                   | 0.294126 | -1.28264 | OKAY |
| FN1     | NM_002026 | Fibronectin 1                                                                   | 0.047732 | 1.231894 | OKAY |
| FXYD5   | NM_014164 | FXYD domain containing ion transport regulator 5                                | 0.473154 | -1.12467 | OKAY |
| GNRH1   | NM_000825 | Gonadotropin-releasing hormone 1 (luteinizing-releasing hormone)                | 0.437771 | -2.20792 | B    |
| HGF     | NM_000601 | Hepatocyte growth factor (hepapoietin A; scatter factor)                        | 0.941716 | -1.11272 | C    |
| HPSE    | NM_006665 | Heparanase                                                                      | 0.83797  | -1.08803 | OKAY |
| HRAS    | NM_005343 | V-Ha-ras Harvey rat sarcoma viral oncogene homolog                              | 0.301705 | -1.322   | OKAY |
| HTATIP2 | NM_006410 | HIV-1 Tat interactive protein 2, 30kDa                                          | 0.725035 | -1.09985 | OKAY |
| IGF1    | NM_000618 | Insulin-like growth factor 1 (somatomedin C)                                    | 0.784732 | -1.21017 | OKAY |
| IL18    | NM_001562 | Interleukin 18 (interferon-gamma-inducing factor)                               | 0.548008 | -1.15815 | OKAY |
| IL1B    | NM_000576 | Interleukin 1, beta                                                             | 0.442934 | -1.61621 | OKAY |
| ITGA7   | NM_002206 | Integrin, alpha 7                                                               | 0.885548 | 1.111983 | B    |
| ITGB3   | NM_000212 | Integrin, beta 3 (platelet glycoprotein IIIa, antigen CD61)                     | 0.500032 | 1.146744 | OKAY |
| KISS1   | NM_002256 | KiSS-1 metastasis-suppressor                                                    | 0.095299 | 2.341258 | B    |
| KISS1R  | NM_032551 | KISS1 receptor                                                                  | 0.941716 | -1.11272 | C    |
| KRAS    | NM_004985 | V-Ki-ras2 Kirsten rat sarcoma viral oncogene homolog                            | 0.5597   | 1.139427 | OKAY |
| MCAM    | NM_006500 | Melanoma cell adhesion molecule                                                 | 0.168785 | -1.29697 | OKAY |
| MDM2    | NM_002392 | Mdm2 p53 binding protein homolog (mouse)                                        | 0.416072 | 1.209495 | OKAY |
| MET     | NM_000245 | Met proto-oncogene (hepatocyte growth factor receptor)                          | 0.968884 | -1.0691  | OKAY |
| METAP2  | NM_006838 | Methionyl aminopeptidase 2                                                      | 0.438876 | 1.367225 | OKAY |
| MGAT5   | NM_002410 | Mannosyl (alpha-1,6-)-glycoprotein<br>beta-1,6-N-acetyl-glucosaminyltransferase | 0.45006  | 1.211376 | B    |
| MMP10   | NM_002425 | Matrix metalloproteinase 10 (stromelysin 2)                                     | 0.616525 | 1.063492 | B    |
| MMP11   | NM_005940 | Matrix metalloproteinase 11 (stromelysin 3)                                     | 0.633542 | 1.06558  | OKAY |

|          |           |                                                                                               |          |          |      |
|----------|-----------|-----------------------------------------------------------------------------------------------|----------|----------|------|
| MMP13    | NM_002427 | Matrix metalloproteinase 13 (collagenase 3)                                                   | 0.196956 | 1.496426 | B    |
| MMP2     | NM_004530 | Matrix metalloproteinase 2 (gelatinase A, 72kDa gelatinase, 72kDa type IV collagenase)        | 0.499929 | -1.11727 | OKAY |
| MMP3     | NM_002422 | Matrix metalloproteinase 3 (stromelysin 1, progelatinase)                                     | 0.241062 | 1.327134 | B    |
| MMP7     | NM_002423 | Matrix metalloproteinase 7 (matrilysin, uterine)                                              | 0.327655 | 1.648755 | A    |
| MMP9     | NM_004994 | Matrix metalloproteinase 9 (gelatinase B, 92kDa gelatinase, 92kDa type IV collagenase)        | 0.034077 | -1.73309 | OKAY |
| MTA1     | NM_004689 | Metastasis associated 1                                                                       | 0.997312 | 1.03201  | OKAY |
| MTSS1    | NM_014751 | Metastasis suppressor 1                                                                       | 0.907747 | -1.12187 | B    |
| MYC      | NM_002467 | V-myc myelocytomatosis viral oncogene homolog (avian)                                         | 0.989481 | 1.023254 | OKAY |
| MYCL     | NM_005376 | V-myc myelocytomatosis viral oncogene homolog 1, lung carcinoma derived (avian)               | 0.828161 | 1.020831 | B    |
| NF2      | NM_000268 | Neurofibromin 2 (merlin)                                                                      | 0.673838 | -1.11124 | B    |
| NME1     | NM_000269 | Non-metastatic cells 1, protein (NM23A) expressed in                                          | 0.256184 | -1.15041 | OKAY |
| NME4     | NM_005009 | Non-metastatic cells 4, protein expressed in                                                  | 0.247389 | -1.21404 | OKAY |
| NR4A3    | NM_006981 | Nuclear receptor subfamily 4, group A, member 3                                               | 0.928218 | -1.13791 | OKAY |
| PLAUR    | NM_002659 | Plasminogen activator, urokinase receptor                                                     | 0.061764 | -1.37303 | OKAY |
| PNN      | NM_002687 | Pinin, desmosome associated protein                                                           | 0.353968 | 1.343566 | OKAY |
| PTEN     | NM_000314 | Phosphatase and tensin homolog                                                                | 0.445862 | 1.347252 | OKAY |
| RB1      | NM_000321 | Retinoblastoma 1                                                                              | 0.441932 | 1.254058 | OKAY |
| RORB     | NM_006914 | RAR-related orphan receptor B                                                                 | 0.587815 | -1.11285 | B    |
| RPSA     | NM_002295 | Ribosomal protein SA                                                                          | 0.840943 | -1.12381 | OKAY |
| SERPINE1 | NM_000602 | Serpin peptidase inhibitor, clade E (nexin, plasminogen activator inhibitor type 1), member 1 | 0.36268  | -1.23971 | OKAY |
| SET      | NM_003011 | SET nuclear oncogene                                                                          | 0.160907 | 1.280094 | OKAY |
| SMAD2    | NM_005901 | SMAD family member 2                                                                          | 0.888518 | -1.09318 | OKAY |

|         |           |                                                                    |          |          |      |
|---------|-----------|--------------------------------------------------------------------|----------|----------|------|
| SMAD4   | NM_005359 | SMAD family member 4                                               | 0.240414 | 1.440229 | OKAY |
| SRC     | NM_005417 | V-src sarcoma (Schmidt-Ruppin A-2) viral oncogene homolog (avian)  | 0.616017 | -1.37165 | B    |
| SSTR2   | NM_001050 | Somatostatin receptor 2                                            | 0.828306 | -1.02753 | B    |
| SYK     | NM_003177 | Spleen tyrosine kinase                                             | 0.941716 | -1.11272 | C    |
| TCF20   | NM_005650 | Transcription factor 20 (AR1)                                      | 0.639317 | 1.093421 | OKAY |
| TGFB1   | NM_000660 | Transforming growth factor, beta 1                                 | 0.248561 | -1.3087  | OKAY |
| TIMP2   | NM_003255 | TIMP metalloproteinase inhibitor 2                                 | 0.136599 | 1.177798 | OKAY |
| TIMP3   | NM_000362 | TIMP metalloproteinase inhibitor 3                                 | 0.25144  | -1.21614 | OKAY |
| TIMP4   | NM_003256 | TIMP metalloproteinase inhibitor 4                                 | 0.95758  | -1.20065 | OKAY |
| TNFSF10 | NM_003810 | Tumor necrosis factor (ligand) superfamily, member 10              | 0.486188 | 1.470209 | A    |
| TP53    | NM_000546 | Tumor protein p53                                                  | 0.971027 | -1.03106 | OKAY |
| TRPM1   | NM_002420 | Transient receptor potential cation channel, subfamily M, member 1 | 0.941716 | -1.11272 | C    |
| TSHR    | NM_000369 | Thyroid stimulating hormone receptor                               | 0.941716 | -1.11272 | C    |
| VEGFA   | NM_003376 | Vascular endothelial growth factor A                               | 0.25337  | -1.31891 | OKAY |
| ACTB    | NM_001101 | Actin, beta                                                        | 0.196933 | 1.245451 | OKAY |
| B2M     | NM_004048 | Beta-2-microglobulin                                               | 0.873538 | -1.22524 | OKAY |
| GAPDH   | NM_002046 | Glyceraldehyde-3-phosphate dehydrogenase                           | 0.89884  | 1.027091 | OKAY |
| HPRT1   | NM_000194 | Hypoxanthine phosphoribosyltransferase 1                           | 0.342481 | 1.209938 | OKAY |
| RPLP0   | NM_001002 | Ribosomal protein, large, P0                                       | 0.141741 | -1.26322 | OKAY |

110

111 A: This gene's average threshold cycle is relatively high ( $> 30$ ) in either the control or the test sample, and is reasonably low in the other sample  
112 ( $< 30$ ). These data mean that the gene's expression is relatively low in one sample and reasonably detected in the other sample suggesting that  
113 the actual fold-change value is at least as large as the calculated and reported fold-change result. This fold-change result may also have greater  
114 variations if p value  $> 0.05$ ; therefore, it is important to have a sufficient number of biological replicates to validate the result for this gene.

115

116 B: This gene's average threshold cycle is relatively high ( $> 30$ ), meaning that its relative expression level is low, in both control and test

117 samples, and the p-value for the fold-change is either unavailable or relatively high ( $p > 0.05$ ). This fold-change result may also have greater  
118 variations; therefore, it is important to have a sufficient number of biological replicates to validate the result for this gene.

119

120 C: This gene's average threshold cycle is either not determined or greater than the defined cut-off (default 35), in both samples meaning that its  
121 expression was undetected, making this fold-change result erroneous and un-interpretable.

122

123

124

125

126

127

128

129

**Supplementary file 6: Table S5. Differentially expressed circRNAs of down regulation in gastric cancer.**

| probeID      | P-value     | FC (abs)  | Regulation | Alias            | circRNA type | miRNA Binding Sites |                  |                   |                   |                   |
|--------------|-------------|-----------|------------|------------------|--------------|---------------------|------------------|-------------------|-------------------|-------------------|
| ASCRP3009602 | 0.001102449 | 4.3109455 | down       | hsa_circ_0027966 | exonic       | hsa-miR-6501-5p     | hsa-miR-17-3p    | hsa-miR-653-3p    | hsa-miR-29b-1-5p  | hsa-miR-4506      |
| ASCRP3001814 | 0.000675962 | 4.2836462 | down       | hsa_circ_0097100 | exonic       | hsa-miR-6501-5p     | hsa-miR-3064-3p  | hsa-miR-424-5p    | hsa-miR-15b-5p    | hsa-miR-6838-5p   |
| ASCRP3009428 | 0.041487479 | 3.8312031 | down       | hsa_circ_0073244 | exonic       | hsa-miR-218-1-3p    | hsa-miR-335-3p   | hsa-miR-33a-3p    | hsa-miR-589-3p    | hsa-miR-134-5p    |
| ASCRP3009292 | 0.009114575 | 3.1071768 | down       | hsa_circ_0056281 | exonic       | hsa-miR-892c-3p     | hsa-miR-597-3p   | hsa-miR-513c-5p   | hsa-miR-181b-5p   | hsa-miR-635       |
| ASCRP3002173 | 0.002793197 | 3.0950285 | down       | hsa_circ_0000497 | exonic       | hsa-miR-200b-3p     | hsa-miR-491-5p   | hsa-miR-141-5p    | hsa-miR-200c-3p   | hsa-miR-429       |
| ASCRP3007576 | 0.007111144 | 3.0873926 | down       | hsa_circ_0006528 | exonic       | hsa-miR-892a        | hsa-miR-7-5p     | hsa-miR-329-5p    | hsa-miR-204-3p    | hsa-miR-449c-5p   |
| ASCRP3001896 | 0.031758793 | 2.8110134 | down       | hsa_circ_0001400 | exonic       | hsa-miR-425-5p      | hsa-miR-485-3p   | hsa-miR-637       | hsa-miR-519d-3p   | hsa-miR-29b-1-5p  |
| ASCRP3012554 | 0.046853695 | 2.7764378 | down       | hsa_circ_0077736 | exonic       | hsa-miR-6507-3p     | hsa-miR-6077     | hsa-miR-8065      | hsa-miR-1248      | hsa-miR-942-5p    |
| ASCRP3010196 | 0.010017895 | 2.7364418 | down       | hsa_circ_0007292 | exonic       | hsa-miR-103a-2-5p   | hsa-miR-19b-2-5p | hsa-miR-335-3p    | hsa-miR-153-5p    | hsa-miR-376b-3p   |
| ASCRP3008095 | 0.035879103 | 2.654156  | down       | hsa_circ_0002664 | exonic       | hsa-miR-374a-3p     | hsa-miR-550a-5p  | hsa-miR-550a-3-5p | hsa-miR-181a-5p   | hsa-miR-101-5p    |
| ASCRP3009067 | 0.009204668 | 2.6484644 | down       | hsa_circ_0008132 | exonic       | hsa-miR-4753-3p     | hsa-miR-892a     | hsa-miR-4693-5p   | hsa-miR-7-5p      | hsa-miR-6881-3p   |
| ASCRP3005903 | 0.027506859 | 2.6062989 | down       | hsa_circ_0072309 | exonic       | hsa-miR-875-3p      | hsa-miR-516b-5p  | hsa-miR-525-5p    | hsa-miR-515-5p    | hsa-miR-520a-5p   |
| ASCRP3000526 | 0.029889663 | 2.6058737 | down       | hsa_circ_0001678 | exonic       | hsa-miR-8060        | hsa-miR-134-5p   | hsa-miR-1294      | hsa-miR-4709-3p   | hsa-miR-3945      |
| ASCRP3001374 | 0.010470134 | 2.5955736 | down       | hsa_circ_0005652 | exonic       | hsa-miR-329-5p      | hsa-miR-671-5p   | hsa-miR-515-5p    | hsa-miR-20b-3p    | hsa-miR-541-3p    |
| ASCRP3002775 | 0.001281505 | 2.4415774 | down       | hsa_circ_0100928 | exonic       | hsa-miR-8089        | hsa-miR-3150a-3p | hsa-miR-6881-3p   | hsa-miR-4691-5p   | hsa-miR-4646-5p   |
| ASCRP3005290 | 0.002908037 | 2.4355504 | down       | hsa_circ_0007132 | exonic       | hsa-miR-638         | hsa-miR-92a-2-5p | hsa-miR-542-5p    | hsa-miR-769-3p    | hsa-miR-661       |
| ASCRP3009192 | 0.045056042 | 2.4093436 | down       | hsa_circ_0142447 | exonic       | hsa-miR-8060        | hsa-miR-4658     | hsa-miR-6790-5p   | hsa-miR-134-5p    | hsa-miR-1294      |
| ASCRP3006741 | 0.017759737 | 2.3761981 | down       | hsa_circ_0000231 | exonic       | hsa-miR-135b-5p     | hsa-miR-135a-5p  | hsa-miR-518c-5p   | hsa-miR-552-3p    | hsa-miR-30c-1-3p  |
| ASCRP3013398 | 0.034773329 | 2.3309026 | down       | hsa_circ_0009158 | exonic       | hsa-miR-22-5p       | hsa-miR-598-3p   | hsa-miR-3682-5p   | hsa-miR-3199      | hsa-miR-4677-5p   |
| ASCRP3000708 | 0.037013934 | 2.3174977 | down       | hsa_circ_0008337 | exonic       | hsa-miR-22-5p       | hsa-miR-3692-5p  | hsa-miR-670-3p    | hsa-miR-384       | hsa-miR-598-3p    |
| ASCRP3008281 | 0.046765709 | 2.2525026 | down       | hsa_circ_0006554 | exonic       | hsa-miR-15b-3p      | hsa-miR-30d-3p   | hsa-miR-30c-3p    | hsa-miR-19b-3p    | hsa-miR-301a-3p   |
| ASCRP3000976 | 0.037354399 | 2.2071125 | down       | hsa_circ_0077417 | exonic       | hsa-miR-3692-3p     | hsa-miR-149-5p   | hsa-miR-146a-5p   | hsa-miR-2110      | hsa-miR-450a-2-3p |
| ASCRP3006776 | 0.014418646 | 2.1552922 | down       | hsa_circ_0017667 | exonic       | hsa-miR-6856-3p     | hsa-miR-3160-5p  | hsa-miR-5009-5p   | hsa-miR-103a-2-5p | hsa-miR-4659b-3p  |
| ASCRP3012746 | 0.008528096 | 2.1432898 | down       | hsa_circ_0069618 | exonic       | hsa-miR-620         | hsa-miR-542-3p   | hsa-miR-22-5p     | hsa-miR-647       | hsa-miR-570-3p    |
| ASCRP3006721 | 0.04138492  | 2.1036666 | down       | hsa_circ_0058495 | exonic       | hsa-miR-103a-2-5p   | hsa-miR-525-5p   | hsa-miR-182-5p    | hsa-miR-520a-5p   | hsa-miR-22-5p     |
| ASCRP3012555 | 0.014241927 | 2.0504082 | down       | hsa_circ_0003696 | exonic       | hsa-miR-93-3p       | hsa-miR-329-5p   | hsa-miR-501-5p    | hsa-let-7i-5p     | hsa-let-7b-5p     |
| ASCRP3006441 | 0.009614777 | 2.0390738 | down       | hsa_circ_0089972 | exonic       | hsa-miR-129-5p      | hsa-miR-3137     | hsa-miR-1248      | hsa-miR-4538      | hsa-miR-6868-3p   |
| ASCRP3003202 | 0.033416938 | 2.0352515 | down       | hsa_circ_0017675 | exonic       | hsa-miR-4799-3p     | hsa-miR-153-5p   | hsa-miR-223-3p    | hsa-miR-4756-3p   | hsa-miR-4453      |

**A**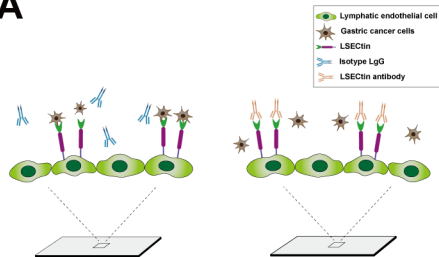**B**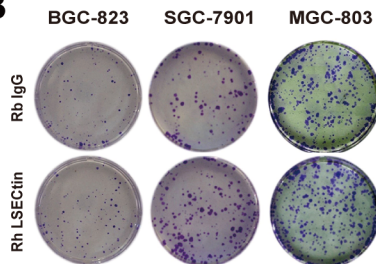**C**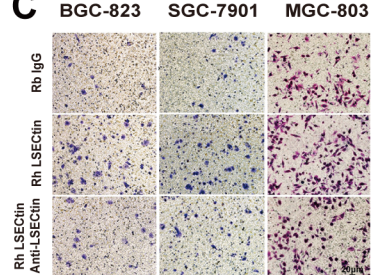**D**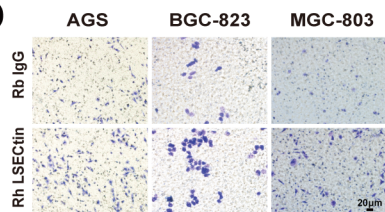**E**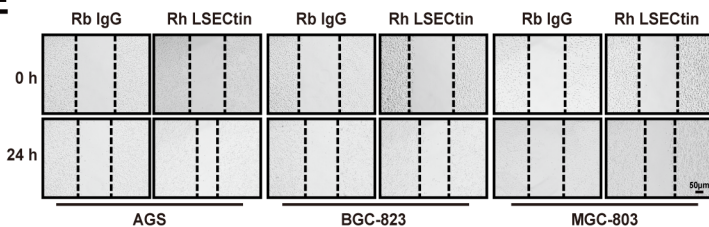**F**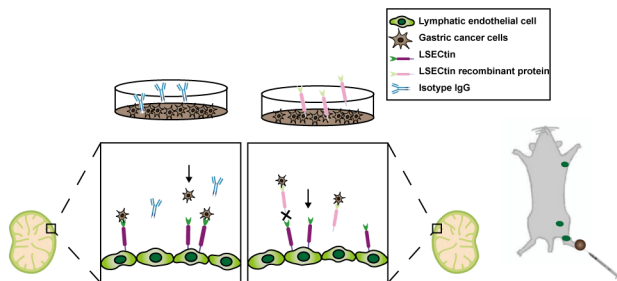**G**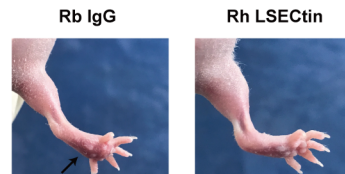**H**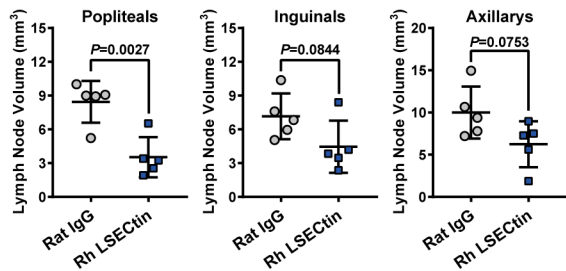**I**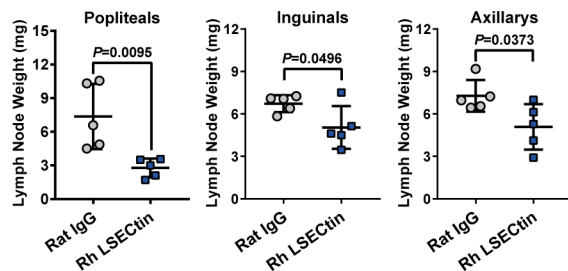

131 **Supplementary file 7: Figure S1. LSEctin positively regulates GC cell adhesion,**  
132 **proliferation, migration, and invasion in vitro and lymphatic metastasis in vivo.** **A** The  
133 schematic overview of the adhesion experiment is shown. **B** Representative image of the  
134 clonogenic assay after cells were treated with the LSEctin protein or control IgG. **C, D** The  
135 representative image of the Transwell assay after cells were treated with the LSEctin protein  
136 or control IgG. **E** The representative image of the wound healing assay after cells were treated  
137 with the LSEctin protein or control IgG. **F.** The schematic overview of the animal experiment  
138 is shown. **G** Representative images of the nude mouse model of lymph node metastasis. **H, I**  
139 The volume and weight of the lymph nodes were measured and assessed.

140

141

142

143

144

145

146

147

148

149

150

151

152

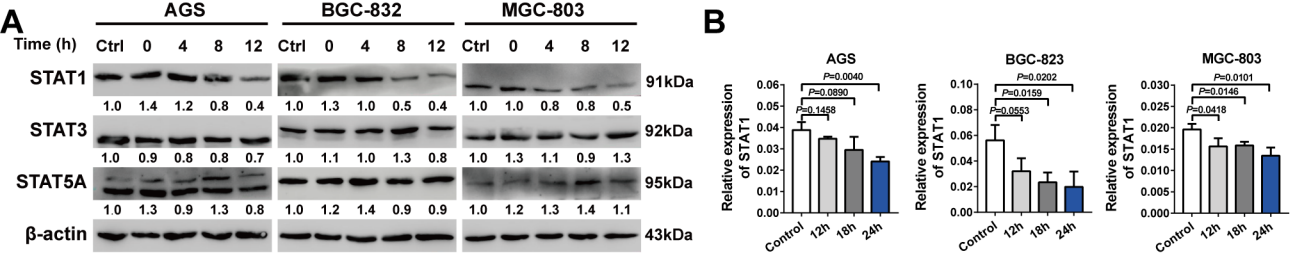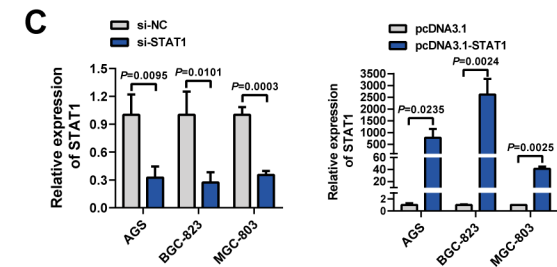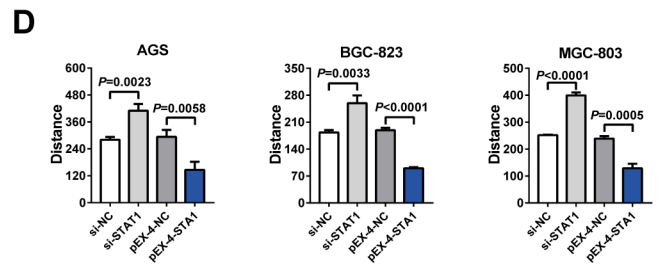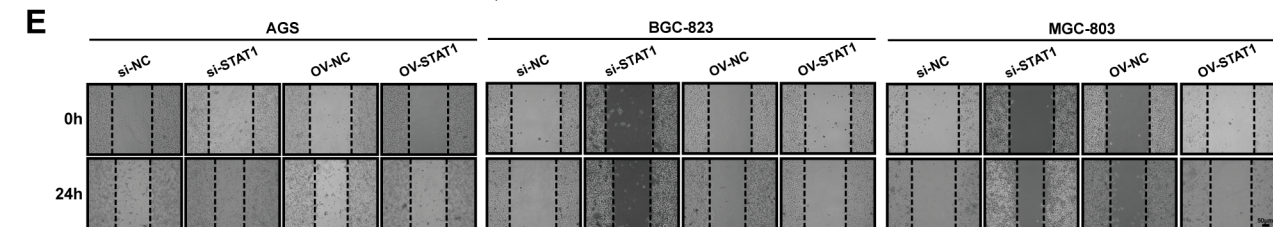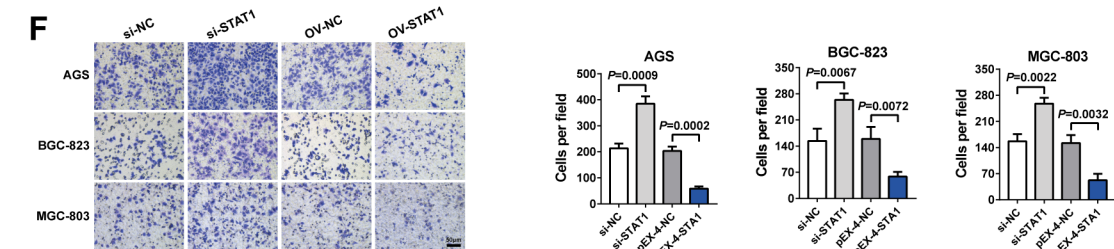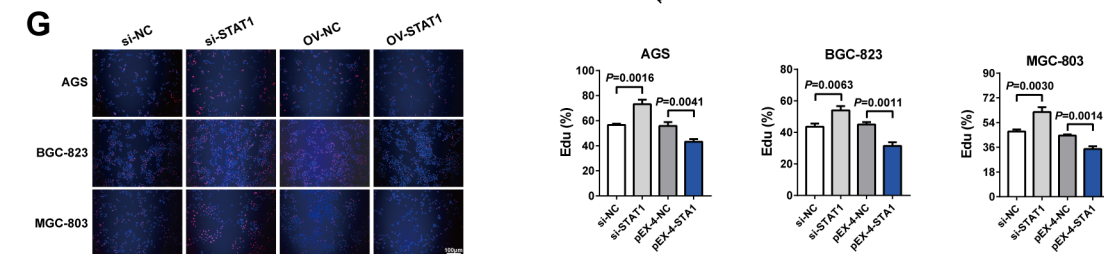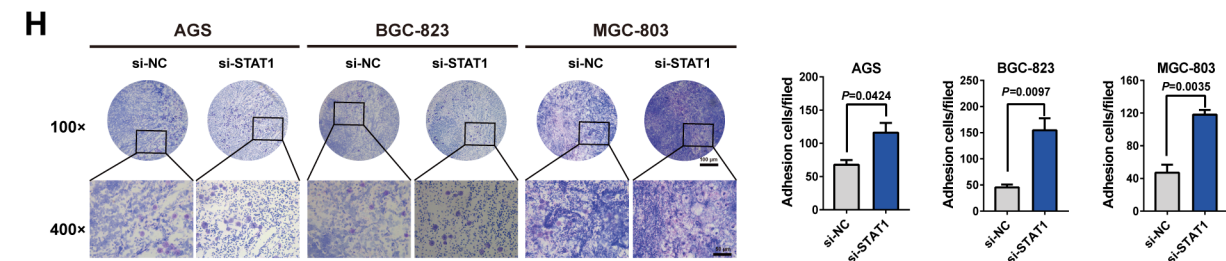



153 **Supplementary file 8: Figure S2. STAT1 down-regulated by LSECTin in GC cells. A** The  
154 expression of tumor-related STATs in gastric cancer cells treated with 5 $\mu$ g/ml LSECTin protein  
155 (0 h, 4 h, 8 h and 12 h) were detected by western blot, controls treated with isotype IgG for 12  
156 h. **B** The downregulation of STAT1 mRNA levels induced by 1  $\mu$ g/ml LSECTin protein in GC  
157 cell lines was detected by qRT-PCR. **C** QPCR confirmed STAT1 expression level upon  
158 knockdown or overexpression in GC cells. **D, E** The migration ability of the STAT1  
159 knockdown and overexpression cells was measured via Wound healing assays. **F** The  
160 migration ability of the STAT1 knockdown and overexpression cells was measured by the  
161 Transwell migration assays. **G** The proliferation ability of the STAT1 knockdown and  
162 overexpression cells was measured by the EdU experiments. **H** Adhesion between GC cells  
163 and frozen mouse lymph node sections was detected in vitro by hemoxylin and eosin (H&E)  
164 staining Error bars indicate standard deviation (n = 3). Data, the means  $\pm$  SD.

165

166

167

168

169

170

171

172

173

174

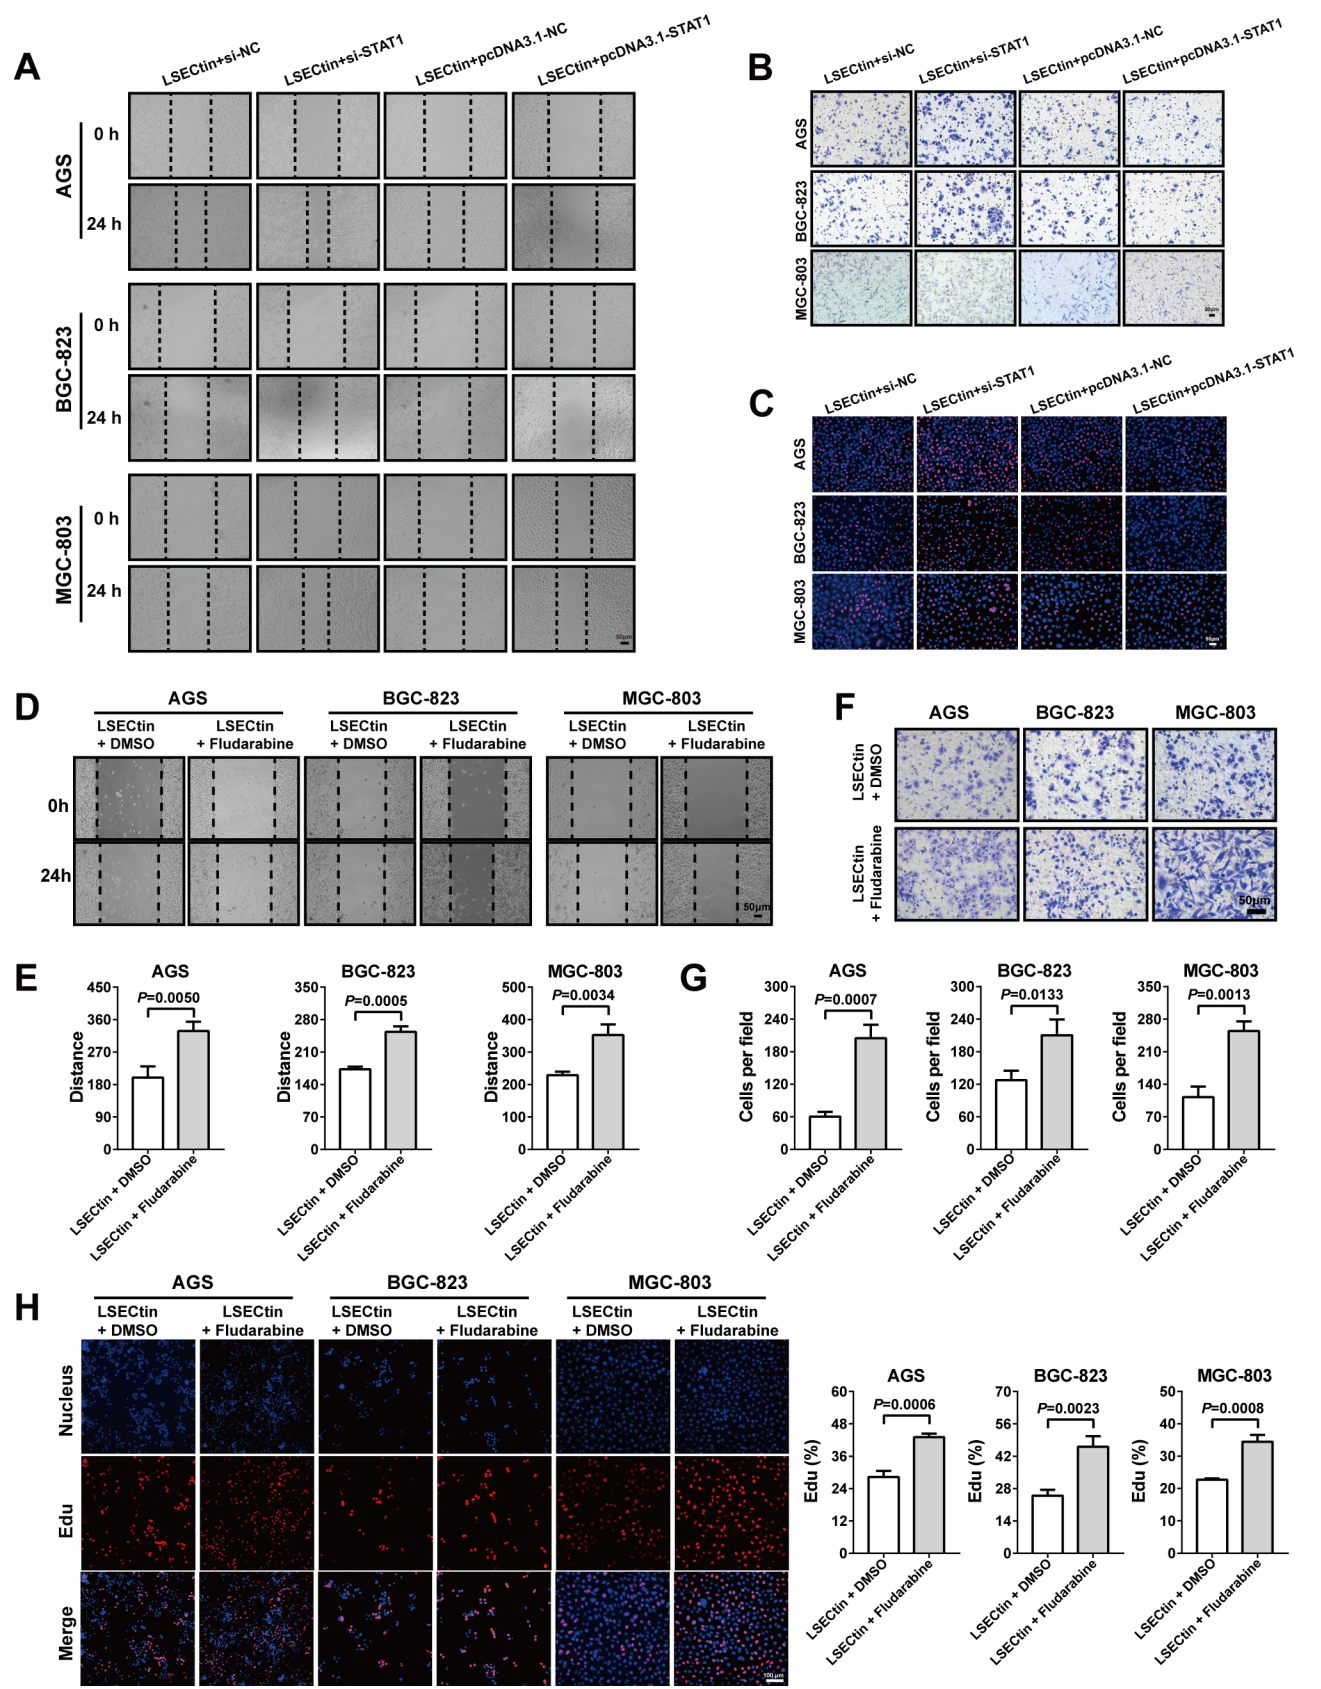

175 **Supplementary file 9: Figure S3. STAT1 down-regulated by LSEctin is involved in GC**

176 **adhesion and migration.**

177 **A, B** Representative images showing effect of different combination treatments on GC cells

178 migration using Wound healing assays (A) and Transwell migration (B) assay. **C**

179 Representative images showing effect of different combination treatments on GC cells

180 proliferation using EdU experiments. **D, E** Wound healing assays showed that LSEctin

181 enhanced GC cells migration treated with fludarabine. **F, G** Transwell migration assays

182 showed that LSEctin enhanced GC cells migration treated with fludarabine. **H** EdU

183 experiments showed that LSEctin enhanced GC cells proliferation treated with fludarabine.

184 Error bars indicate standard deviation (n=3). The representative image of the Transwell assay

185 Data, the means  $\pm$  SD.

186

187

188

189

190

191

192

193

194

195

196

**A**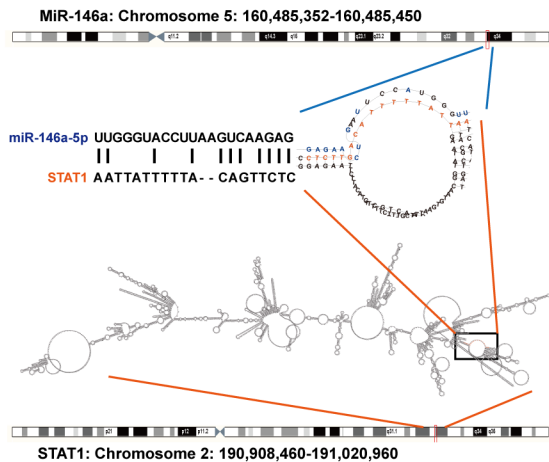**B**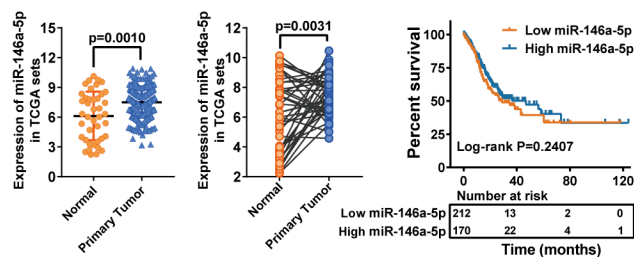**C**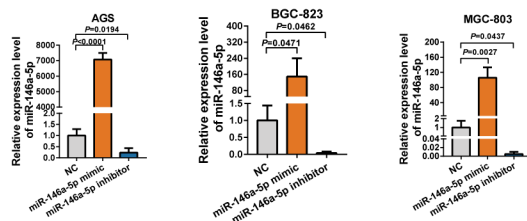**D**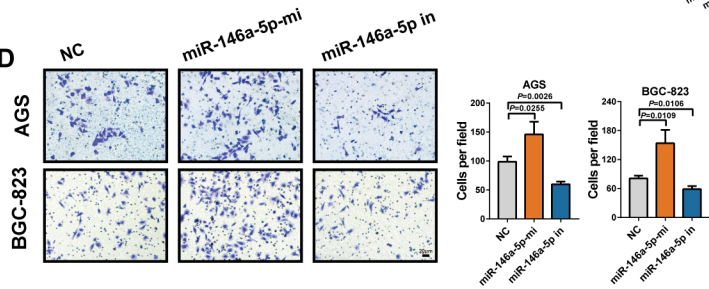**E**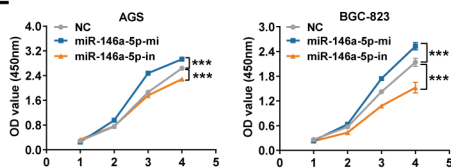**F**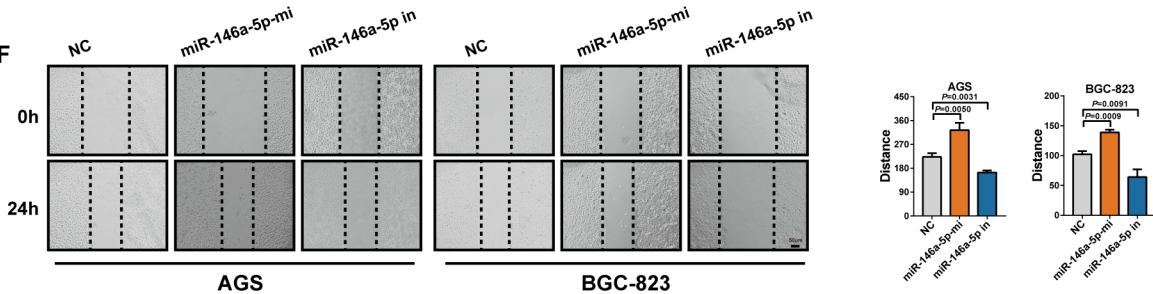

197 **Supplementary file 10: Figure S4. Examination of miR-146a-5p/STAT1 axis in gastric**  
198 **cancer. A** Secondary structure of the specific miR-146a-5p-binding site and its flank regions  
199 in the STAT1 3'-UTR. **B** MiR-146a-5p expression levels in 415 cases of gastric cancer and 35  
200 cases of normal tissue (left), miR-146a-5p expression levels in 32 tumor and matched normal  
201 samples of gastric cancer patients (right). **C** Gastric cancer cells were transfected with  
202 miR-146a-5p mimics, miR-146a-5p inhibitor or miR-NC, and the overexpression or  
203 knockdown of miR-146a-5p was investigated by qPCR. **D** The effect of miR-146a-5p on the  
204 migration of human gastric cancer cells assessed by transwell assays, the statistical views of  
205 transwell migration assays. **E** The cell viability was detected with miR-146a-5p mimics,  
206 miR-146a-5p inhibitor or miR-NC in gastric cancer cell lines by CCK8 assay. **F** The effect of  
207 miR-146a-5p on the migration of human gastric cancer cells assessed by wound healing assays.  
208 Error bars indicate standard deviation (n=3). Data, the means  $\pm$  SD.

209

210

211

212

213

214

215

216

217

218

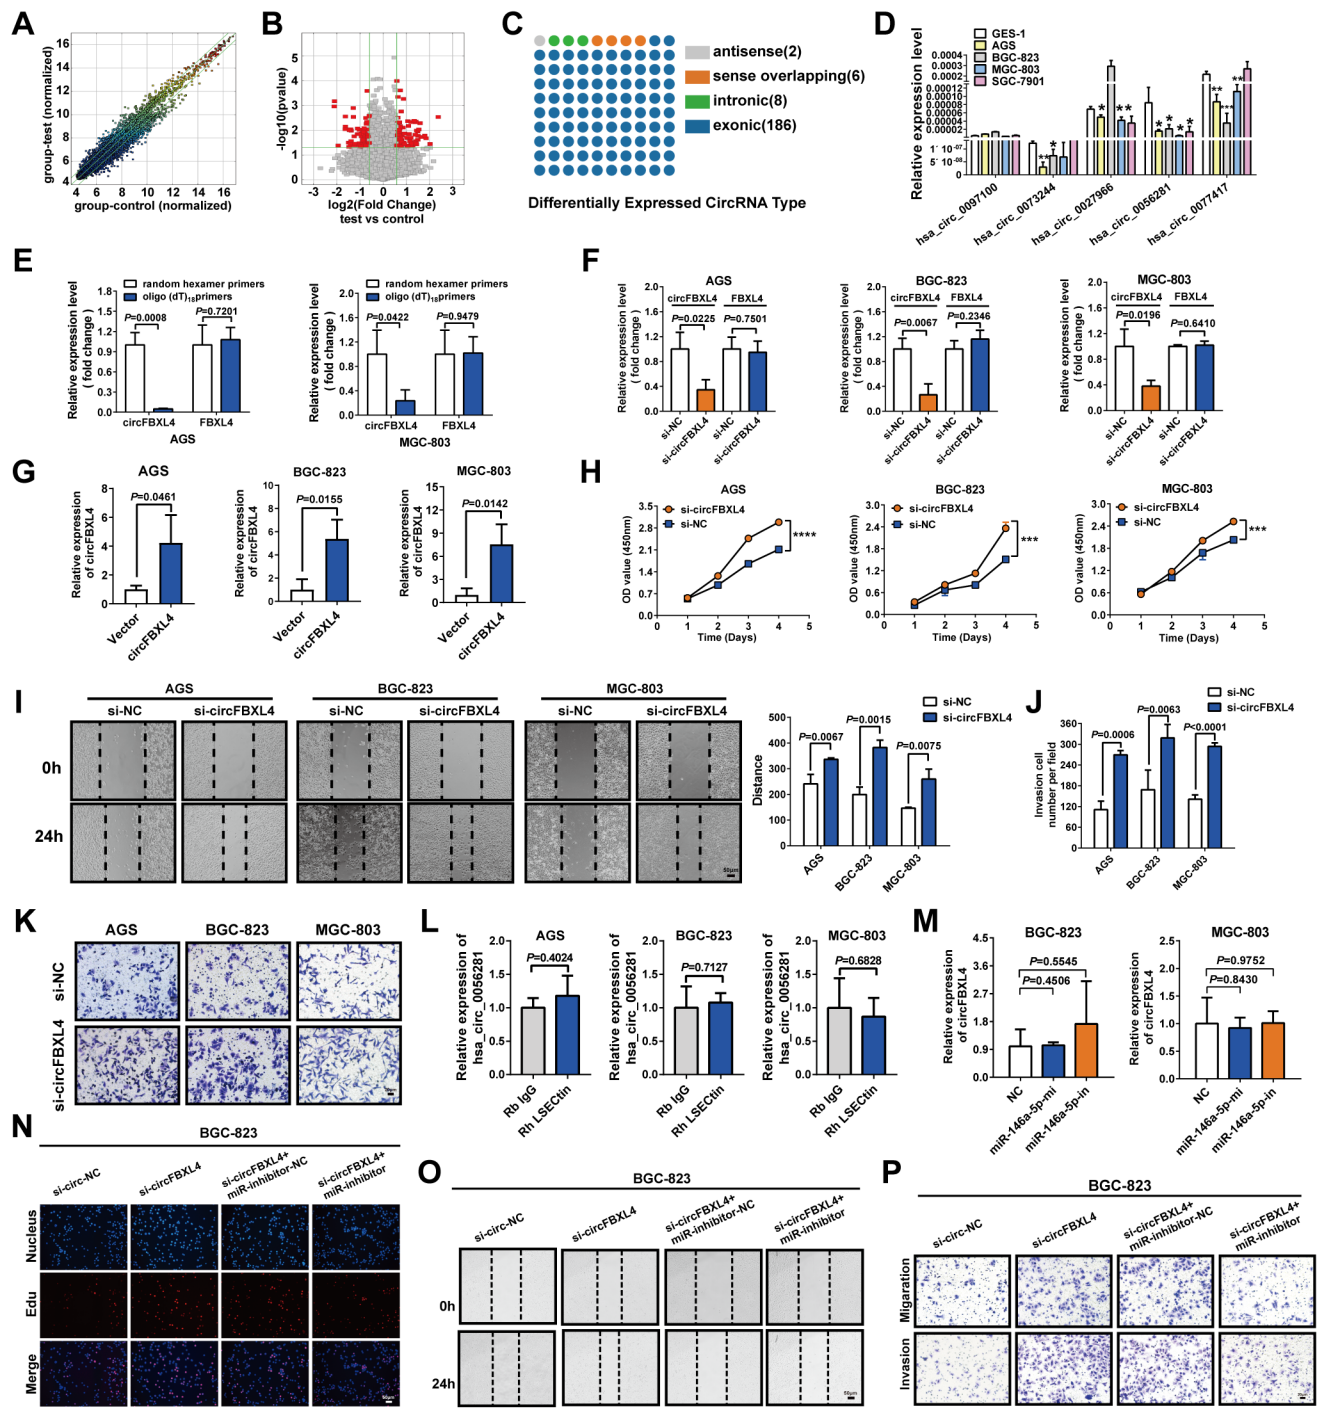

219 **Supplementary file 11: Figure S5. CircFBXL4/miR-146a-5p/STAT1 axis constructed in**  
220 **GC. A** The scatter plot indicates the variation in circRNA expression between GC and normal  
221 stomach samples (log<sub>2</sub> scaled). **B** Volcano plots showing the fold-change values and P-values  
222 of the array data. The red point represents significantly upregulated or downregulated  
223 circRNAs. **C** CircRNAs were classified in four types. **D** CircRNA expression in GC cells and  
224 normal gastric epithelial cells. **E** Oligo (dT)<sub>18</sub> primers and random primers were used for  
225 reverse transcription experiments. The relative RNA levels of circFBXL4 were analyzed by  
226 qRT-PCR. **F, G** qPCR experiments show overexpression or knockdown efficiency of  
227 circFBXL4. **H** Assessment of the proliferation of GC cells transfected with control or  
228 circFBXL4 siRNA by CCK-8 assay. **I-K** Wound healing assay and Transwell migration  
229 experiments showed that knockdown of circFBXL4 promoted the migration of gastric cancer  
230 cell lines AGS, BGC-823 and MGC-803. **L** LSEctin did not affect hsa\_circ\_0056281  
231 expression. **M** The circFBXL4 expression after miR-146a-5p overexpression or silencing in  
232 GC cells was tested by qRT-PCR. **N** Representative images of EdU assays indicated that  
233 miR-146a-5p inhibitors abolished the promotion of proliferation induced by circFBXL4  
234 knockdown. **N** Representative images of Wound healing assays showed that miR-146a-5p  
235 inhibitors suppressed the migration induced by circFBXL4 knockdown. **O, P** Representative  
236 images of Transwell assays showed that miR-146a-5p inhibitors suppressed the migration and  
237 invasion induced by circFBXL4 knockdown. Error bars indicate standard deviation (n = 3).  
238 Data, the means ± SD.

239

240

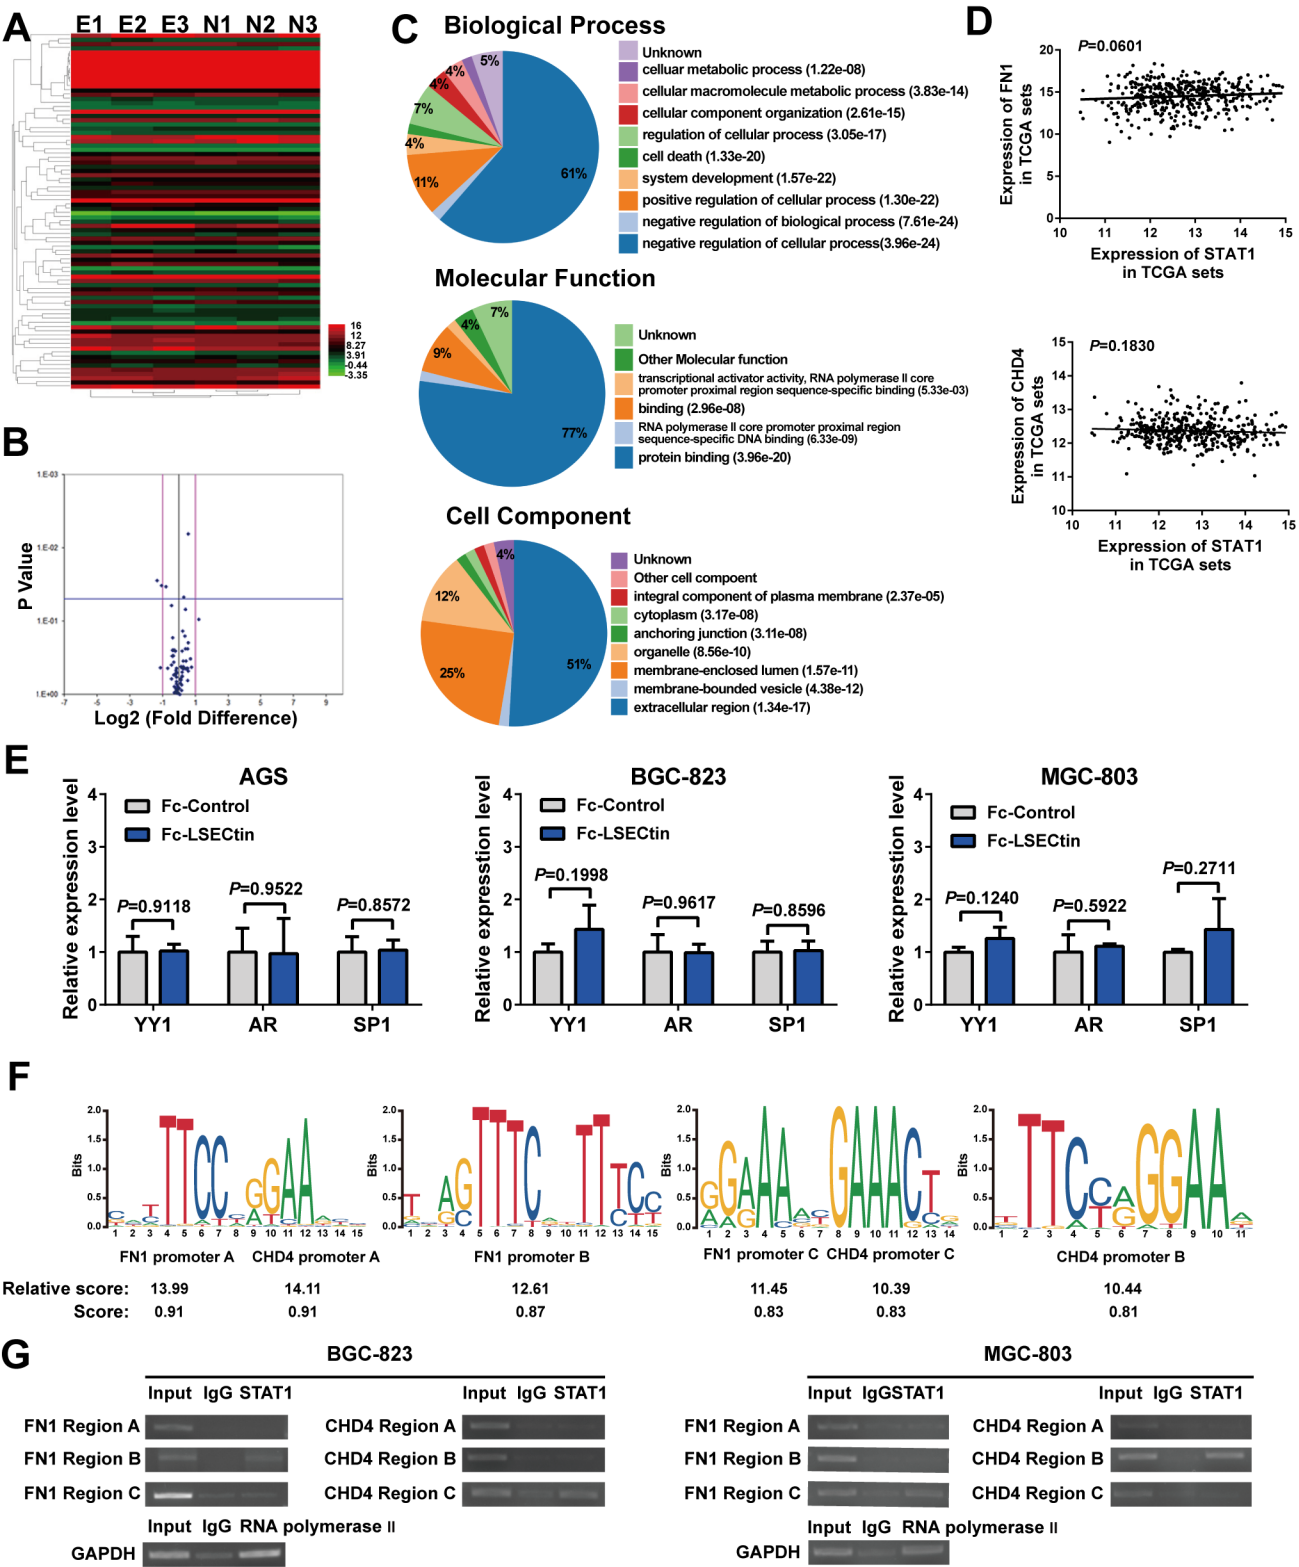



242 **Supplementary file 12: Figure S6. LSECtin induced FN1 and CHD4 expression through**  
243 **STAT1 transcriptional regulation.** **A** Hierarchical clustering revealed differentially  
244 expressed genes stimulated with 1 µg/ml LSECtin protein in MGC-803 cells. **B** Volcano plots  
245 suggesting that the fold-change values (log<sub>2</sub> scaled) and P-values of the array data. **C** The pie  
246 chart shows the biological process, cell component and molecular function categories of  
247 differentially expressed genes. **D** The association of FN1 and/or CHD4 expression and STAT1  
248 from the publicly available TCGA. **E** Differential expression of YY1, AR and SP1 in gastric  
249 cancer cells treated with 1µg/ml LSECtin protein (24 h) were detected by Qpcr. **F** The  
250 schematic overview of the STAT1 motifs was provided. **G** chromatin immunoprecipitation  
251 (ChIP) assay confirmed FN1 and CHD4 promoter regions relative enrichment by the STAT1  
252 antibody. Error bars indicate standard deviation (n = 3). Data, mean ± SD.
