# Supplementary material for: Novel roles of LSECtin in gastric cancer cell adhesion, migration, invasion, and lymphatic metastasis
Source: PubMed Central journal article supplement (PMC9276708; doi:10.1038/s41419-022-05026-x), 2022-07-11
Supplement: 41419_2022_5026_MOESM2_ESM.pdf [file 41419_2022_5026_MOESM2_ESM.pdf]

This document certifies that the manuscript

## **Novel roles of LSEctin in gastric cancer cell adhesion, migration, invasion, and lymphatic metastasis**

prepared by the authors

**Yinan Zhang, Qianshi Zhang et al**

was edited for proper English language, grammar, punctuation, spelling, and overall style by one or more of the highly qualified native English speaking editors at AJE.

This certificate was issued on **November 17, 2021** and may be verified on the [AJE website](#) using the verification code **FAF1-EOB1-3107-225F-631P**.

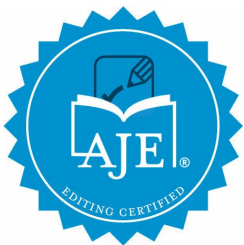

Neither the research content nor the authors' intentions were altered in any way during the editing process. Documents receiving this certification should be English-ready for publication; however, the author has the ability to accept or reject our suggestions and changes. To verify the final AJE edited version, please visit our verification page at [aje.com/certificate](#). If you have any questions or concerns about this edited document, please contact AJE at [support@aje.com](mailto:support@aje.com).
