# Supplementary material for: Novel roles of LSECtin in gastric cancer cell adhesion, migration, invasion, and lymphatic metastasis
Source: PubMed Central journal article supplement (PMC9276708; doi:10.1038/s41419-022-05026-x), 2022-07-11
Supplement: 41419_2022_5026_MOESM4_ESM.pdf [file 41419_2022_5026_MOESM4_ESM.pdf]

# DECLARATION OF CONTRIBUTIONS TO ARTICLE

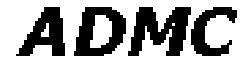

Manuscript Number:

**CDDIS-21-1634**

Journal Name:

*Cell Death & Disease*

(the 'Journal')

Proposed Title of the Contribution:

**Novel roles of LSECtin in gastric cancer cell adhesion, migration, invasion, and lymphatic metastasis**

(the 'Contribution')

Author(s):

**Yinan Zhang, Zhen Feng, Yue Xu, Sufen Jiang, Qianshi Zhang, Zhenyu Zhang, Keyong Wang, Xiaomeng Li, Lijie Xu, Menglang Yuan, Zihao Chen, Jingyi Cui, Han Wu, Yina Gao, Wei Wei, Bo Wang, Yunfei Zuo and Shuangyi Ren**

(the 'Authors')

For all *CDDis* articles, each person named as an author in the published version must be able to show he or she has contributed substantially to the article.

Authorship credit should be based on 1) substantial contributions to conception and design, acquisition of data, or analysis and interpretation of data; 2) drafting the article or revising it critically for important intellectual content; and 3) final approval of the version to be published. Authors should meet conditions 1, 2 and 3.

Any person who cannot be shown to have made a substantial contribution to the article cannot be listed as an author in the final version. The name of any person who is deemed to have made a minor contribution can, however, appear in the Acknowledgments section of the article.

Please complete the table below to indicate the contributions of all named authors to the manuscript.

| Author Full Name: | Specification of Contribution to the Manuscript:                    |
|-------------------|---------------------------------------------------------------------|
| Yinan Zhang       | designed , performed the experiment and wrote manuscript.           |
| Zhen Feng         | collected tissue samples and clinical data                          |
| YueXu             | helped write manuscript and performed the experiment                |
| Sufen Jiang       | provided material support and data collection                       |
| Qianshi Zhang     | collected tissue samples and gave help in animal experiments        |
| Zhenyu Zhang      | gave help in animal experiments                                     |
| Keyong Wang       | experiments and data collection                                     |
| Xiaomeng Li       | cell culture and treatment, collected tissue samples for Chip       |
| Lijie Xu          | experiments and data collection                                     |
| Menglang Yuan     | provided help in design, gave help in cell culture and treatment    |
| Zihao Chen        | provided technical and material support                             |
| Jingyi Cui        | provided technical support, gave help in cell culture and treatment |
| Han Wu            | gave help in animal experiments and data collection                 |



Please complete the table below to indicate the contributions of all named authors to the figures.

Figure 1:

In Figure1, Keyong Wang generated the data and prepared panel A, B. Lijie Xu generated the data and prepared panel C. Yinan Zhang generated the data and prepared panel D,E. Zhen Feng collected clinical samples and clinical information, Yinan Zhang, Yina Gao and Sufen Jiang assembled the figure F. Zihao Chen helped generated information of panel F. Shuangyi Ren and Yunfei Zuo contributed to work supervision and design.

Figure 2:

In Figure2, Yinan Zhang generated the data and prepared panel A, B and G. Yina Gao and Sufen Jiang helped generated information, assembled the figure. Keyong Wang generated the data and prepared panel C-E. Lijie Xu and Yinan Zhang generated the data and prepared panel F. Yinan Zhang, Zhenyu Zhang, Han Wu and Yina Gao generated the data and prepared panel H-I, Qian Shi, Zihao Chen, Bo Wang and Sufen Jiang helped generated information of panel I. Sufen Jiang and Wei Wei gave help in cell culture and treatment. Shuangyi Ren and Yunfei Zuo contributed to work supervision, direction and design.

Figure 3:

In Figure3, Yinan Zhang and Yue Xu generated the data and prepared panel A, Yinan Zhang generated the data and prepared panel B. Yinan Zhang generated the data and prepared panel C-G, Sufen Jiang and Yina Gao helped generated information of panel E-G, Zhenyu Zhang, Han Wu and Bo Wang helped generated information, assembled the figure H. Yunfei Zuo contributed to work supervision, direction and design.

Figure 4:

In Figure4, Xiaomeng Li and Yinan Zhang collected clinical samples, Xiaomeng Li collected to company for circRNA Chip. Yinan Zhang generated the data and prepared Figure4. Menglang Yuan helped generated information of panel B,C and K. Jingyi Cui helped generated information of panel G,J,K and provided technical support. Zihao Chen and Sufen Jiang helped generated information of panel J. Sufen Jiang and Yina Gao helped generated information of panel I, M-O. Shuangyi Ren and Yunfei Zuo contributed to work supervision, direction and design.

Figure 5:

In Figure5, Xiaomeng Li cell culture and treatment, collected samples to company for Chip. Yinan Zhang collected data for bioinformation and generated panel A, B. YueXu generated the data and prepared panel C, D, and G-J. Menglang Yuan helped generated information of panel J, provided technical support, Yinan Zhang involved in E,F, and K. assembled the figure with YueXu. Yunfei Zuo contributed to work supervision, direction and design.

Figure 6:

In Figure6, Yinan Zhang generated the data and prepared Figure6. Sufen Jiang helped generated information of Figure6. Han Wu helped generated information of panel F,H, and J-K. Zhenyu Zhang and Yina Gao helped generated information of panel F-I, J-K. Bo Wang provided technical support of panel I. Shuangyi Ren and Yunfei Zuo contributed to work supervision, direction and design.

Signed for and on behalf of the Author(s):

*Shuangyi Ren*

Print Name:

Shuangyi Ren

Date:

2022.1.4
