# Supplementary material for: Novel roles of LSECtin in gastric cancer cell adhesion, migration, invasion, and lymphatic metastasis
Source: PubMed Central journal article supplement (PMC9276708; doi:10.1038/s41419-022-05026-x), 2022-07-11
Supplement: 41419_2022_5026_MOESM5_ESM.pdf [file 41419_2022_5026_MOESM5_ESM.pdf]

Fig 1

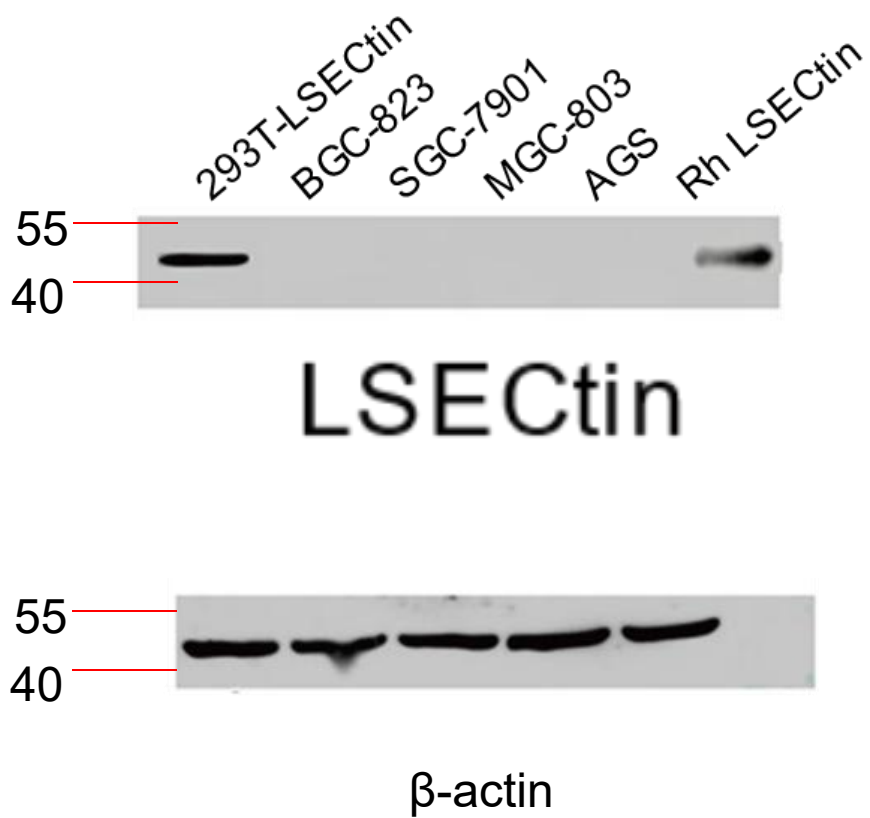

Fig 2

AGS nc 12h 18h 24h

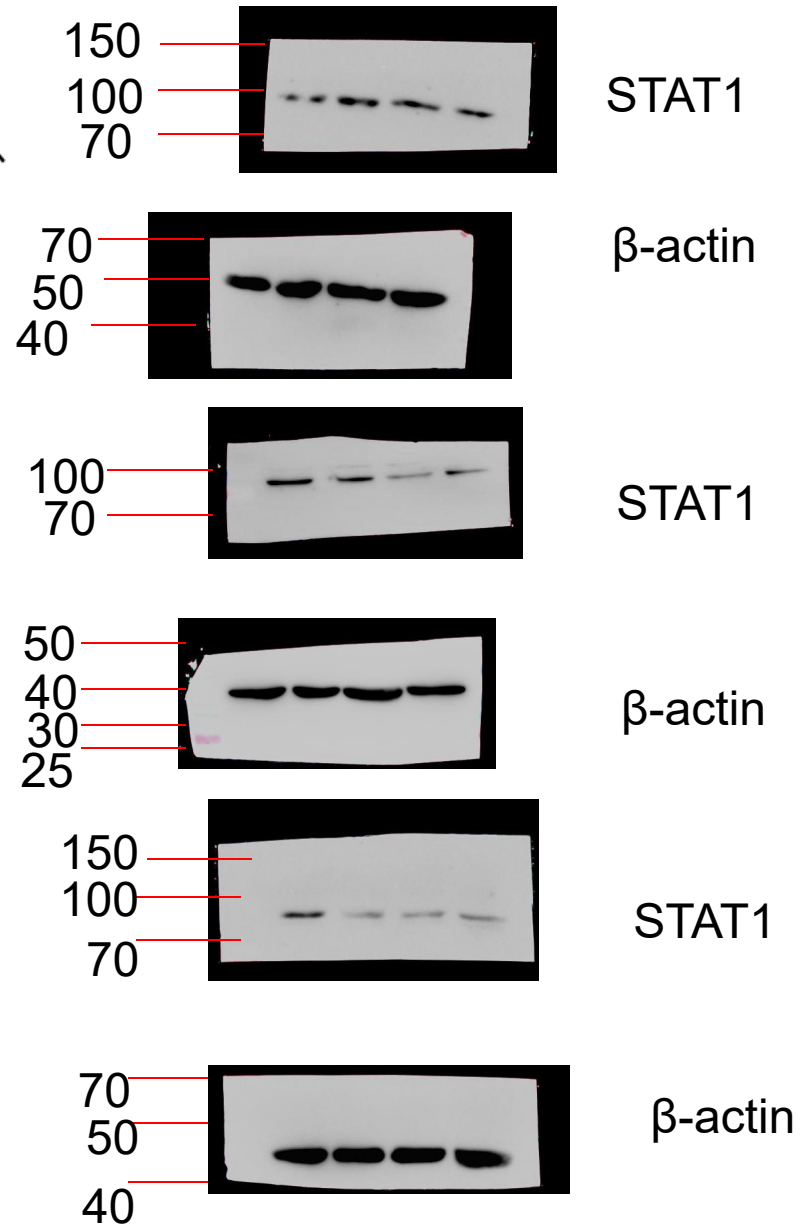

Fig 2

BGC-823 nc 12h 18h 24h

MGC-803 nc 12h 18h 24h

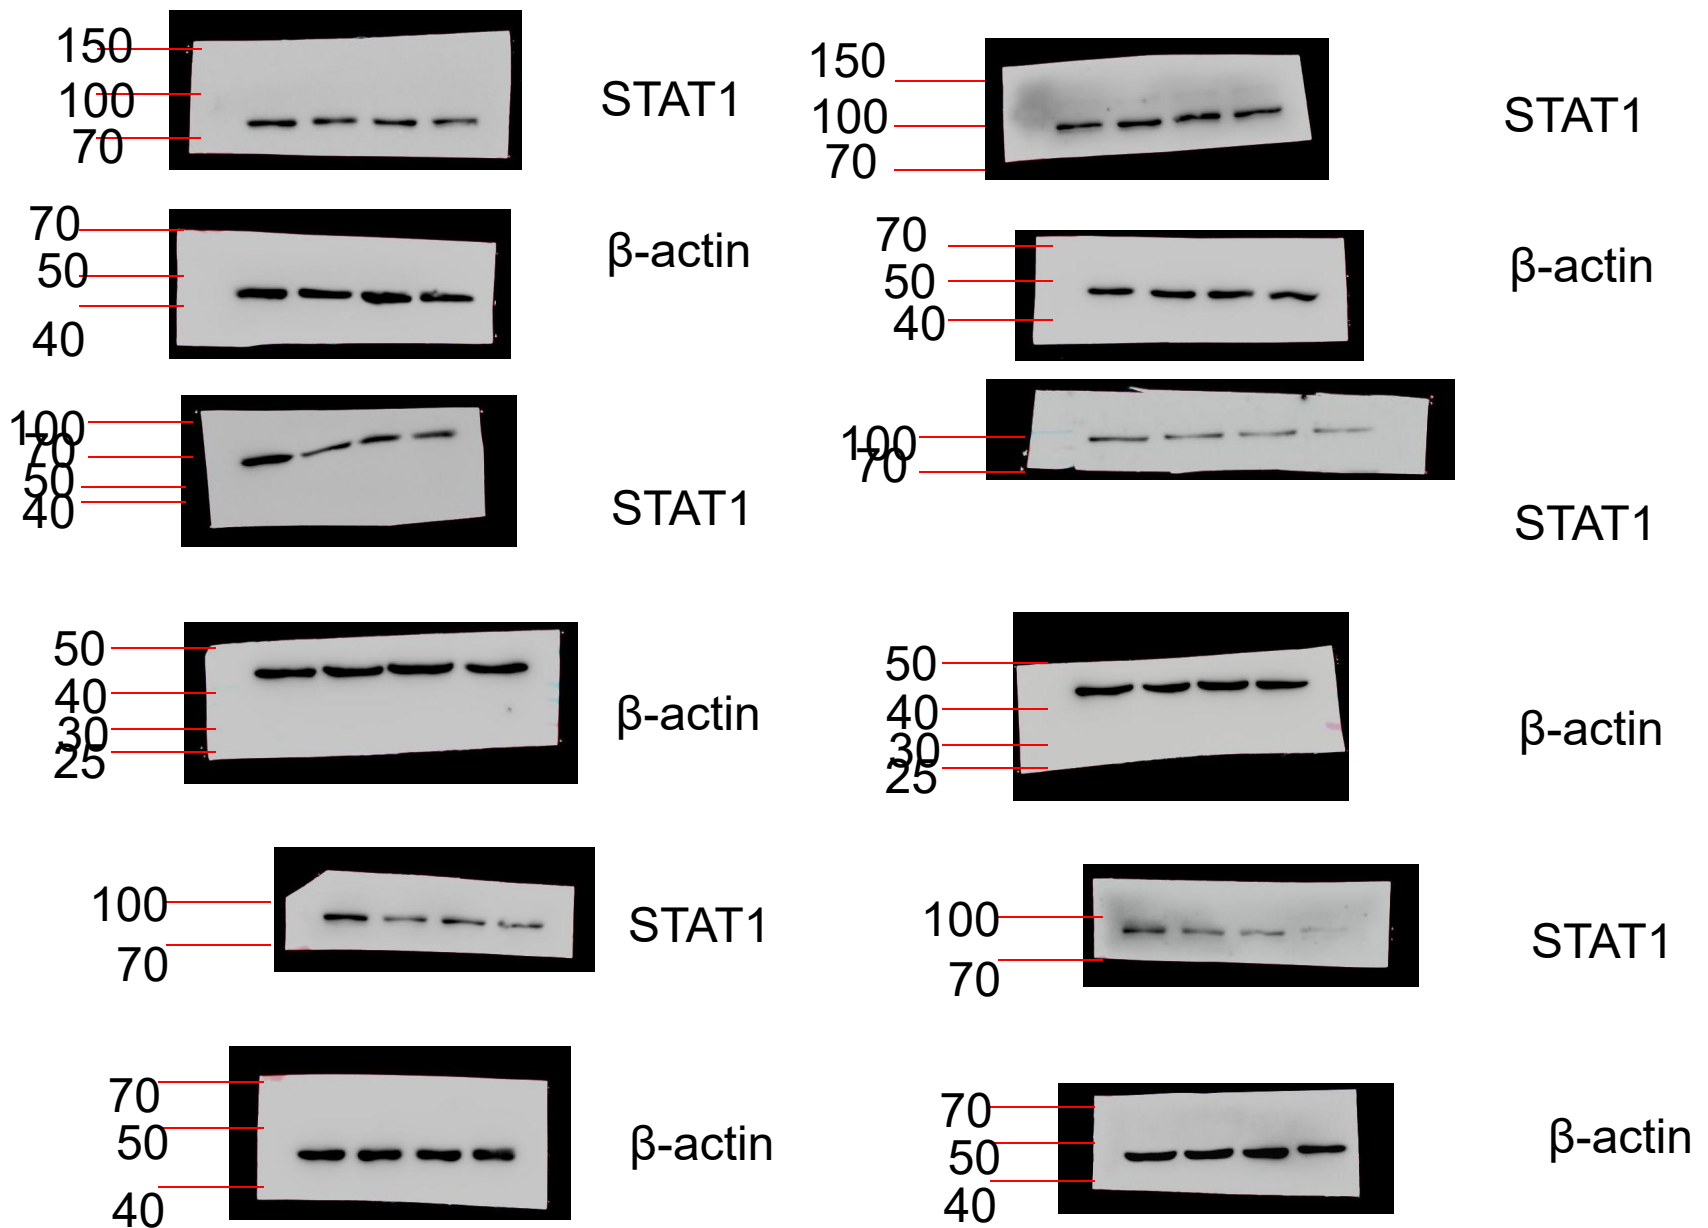

Fig 2

AGS

BGC-823

MGC-803

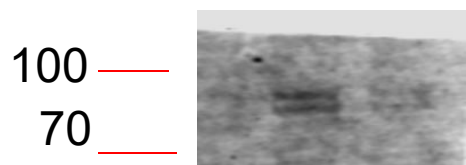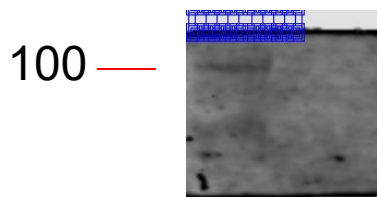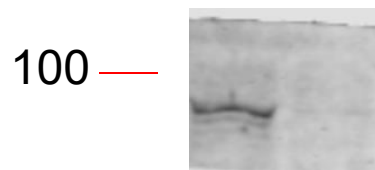

STAT1  
(701)

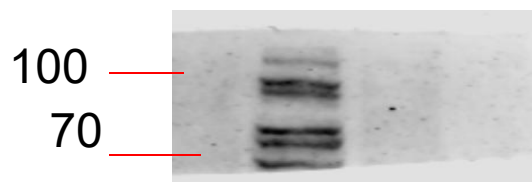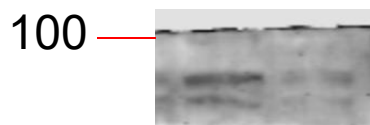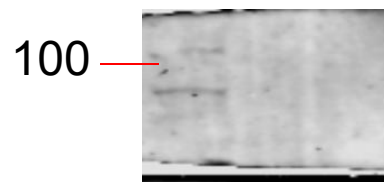

STAT1  
(727)

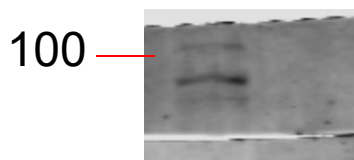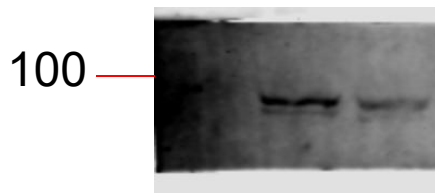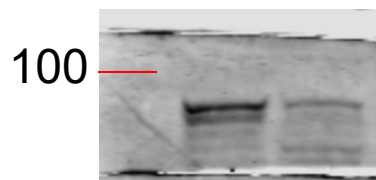

STAT1

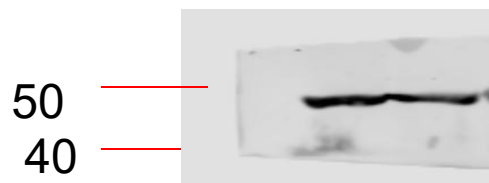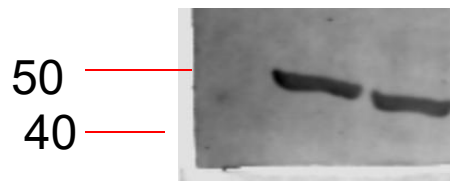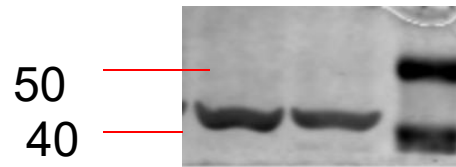

$\beta$ -actin

Fig4

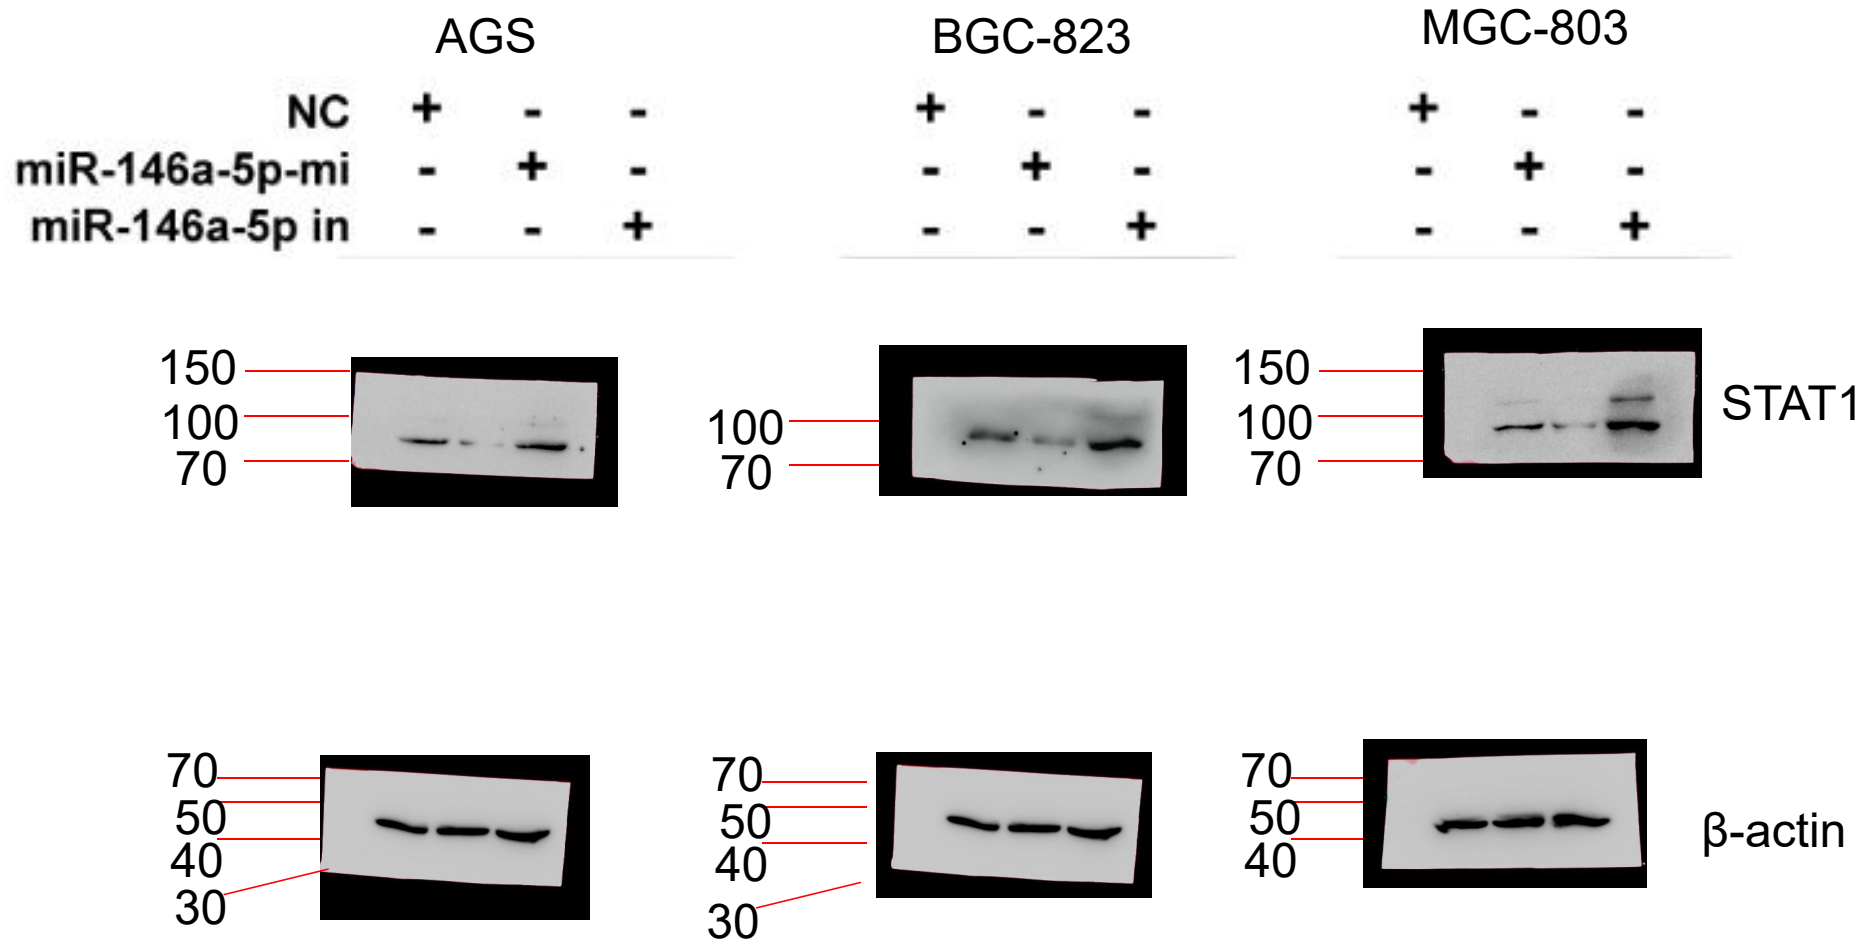

Fig 4  
H

|                      | AGS |   |   |   | BGC-823 |   |   |   | MGC-803 |   |   |   |
|----------------------|-----|---|---|---|---------|---|---|---|---------|---|---|---|
| si-circ-NC           | +   | - | - | - | +       | - | - | - | +       | - | - | - |
| si-circFBXL4         | -   | + | + | + | -       | + | + | + | -       | + | + | + |
| miR-inhibitor-NC     | -   | - | + | - | -       | - | + | - | -       | - | + | - |
| miR146a-5p-inhibitor | -   | - | - | + | -       | - | - | + | -       | - | - | + |

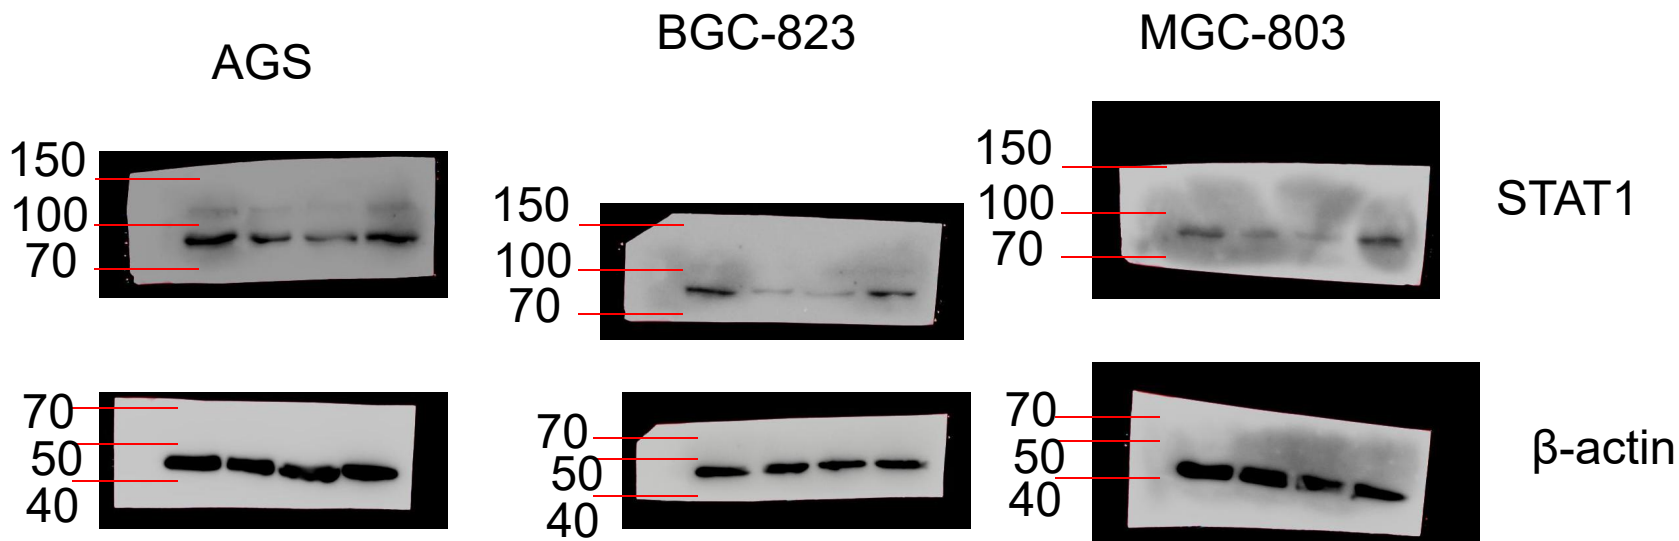

Fig 5

AGS nc 12h 18h 24h

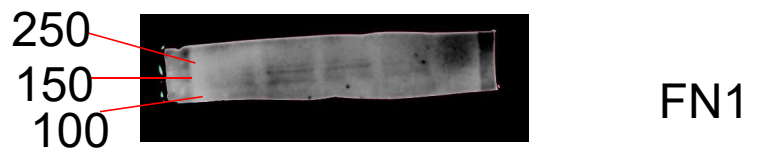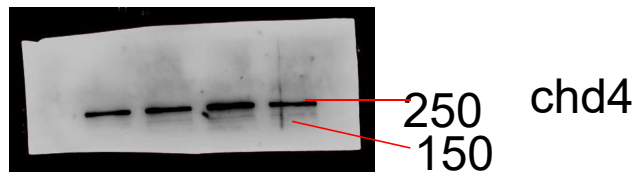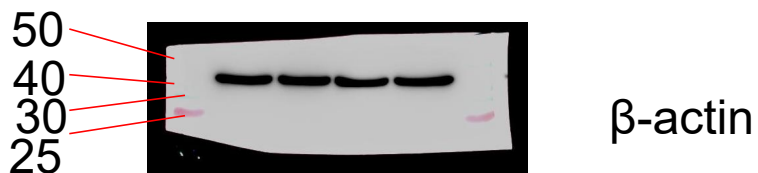

BGC-823 nc 12h 18h 24h

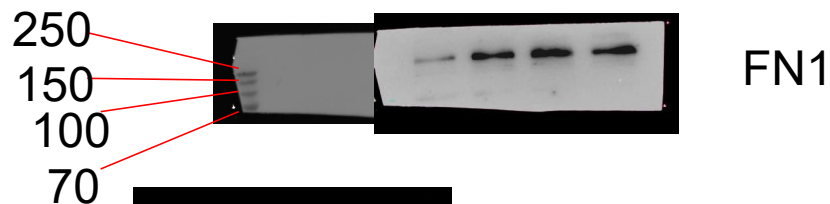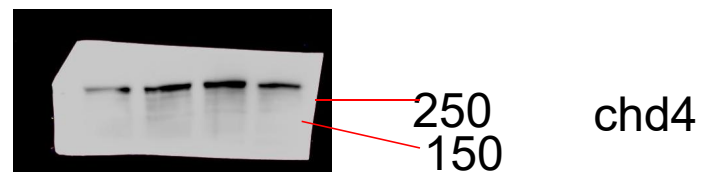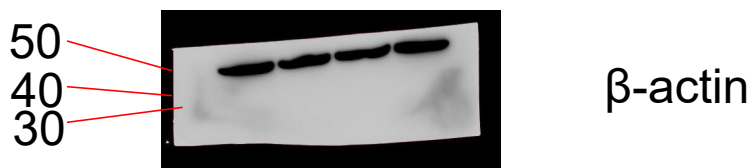

MGC-803 nc 12h 18h 24h

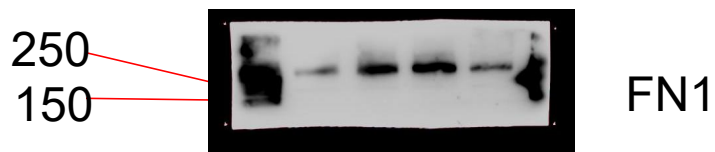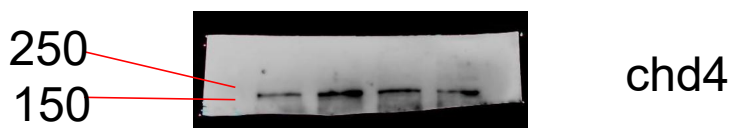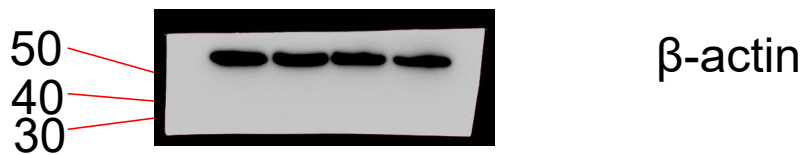

Fig 5

Ags si-NC si-STAT1

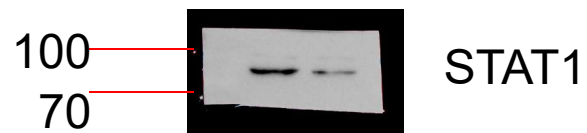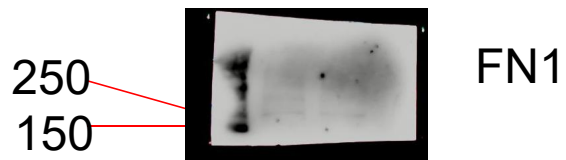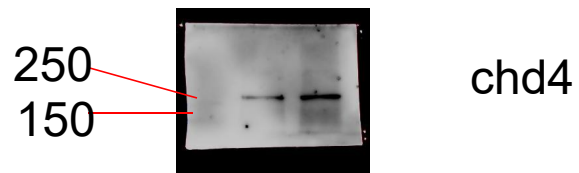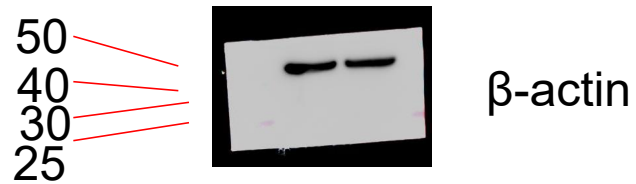

BGC-823 si-NC si-STAT1

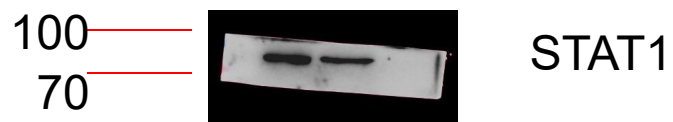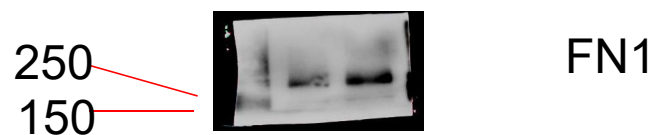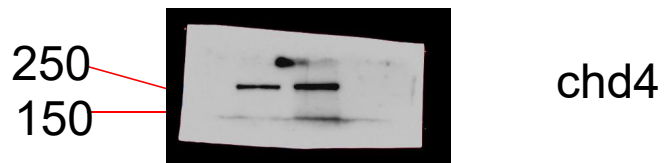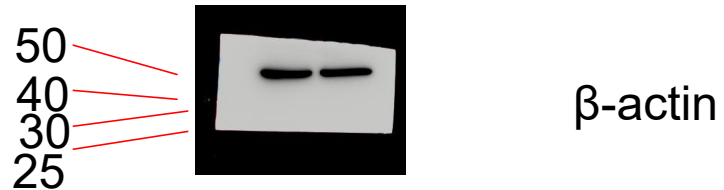

Fig 5

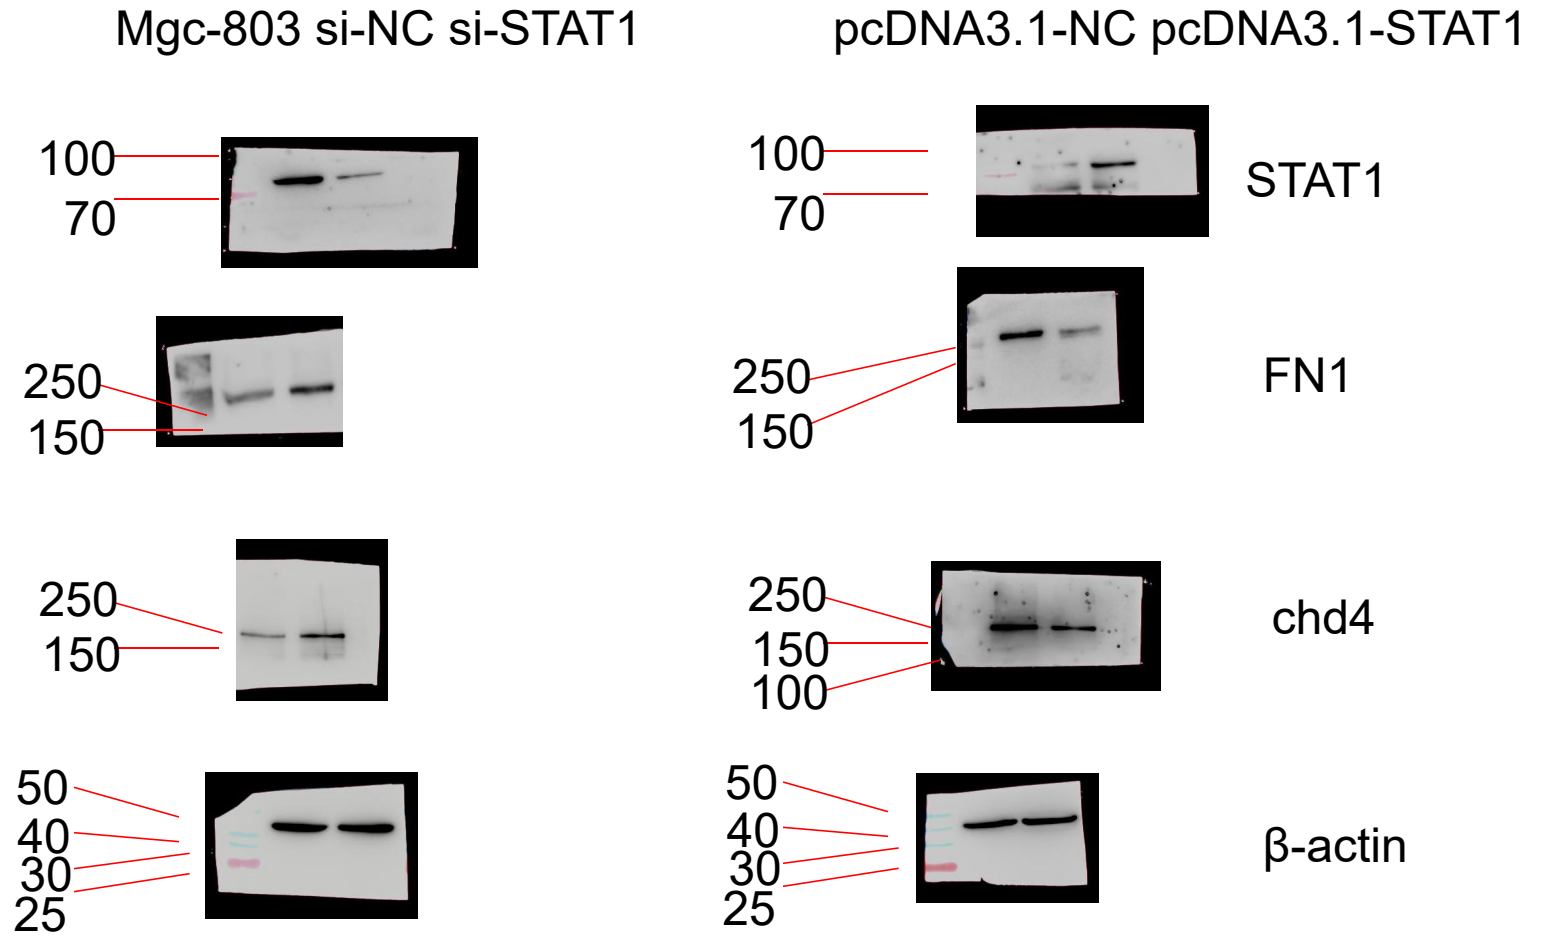



Fig 5

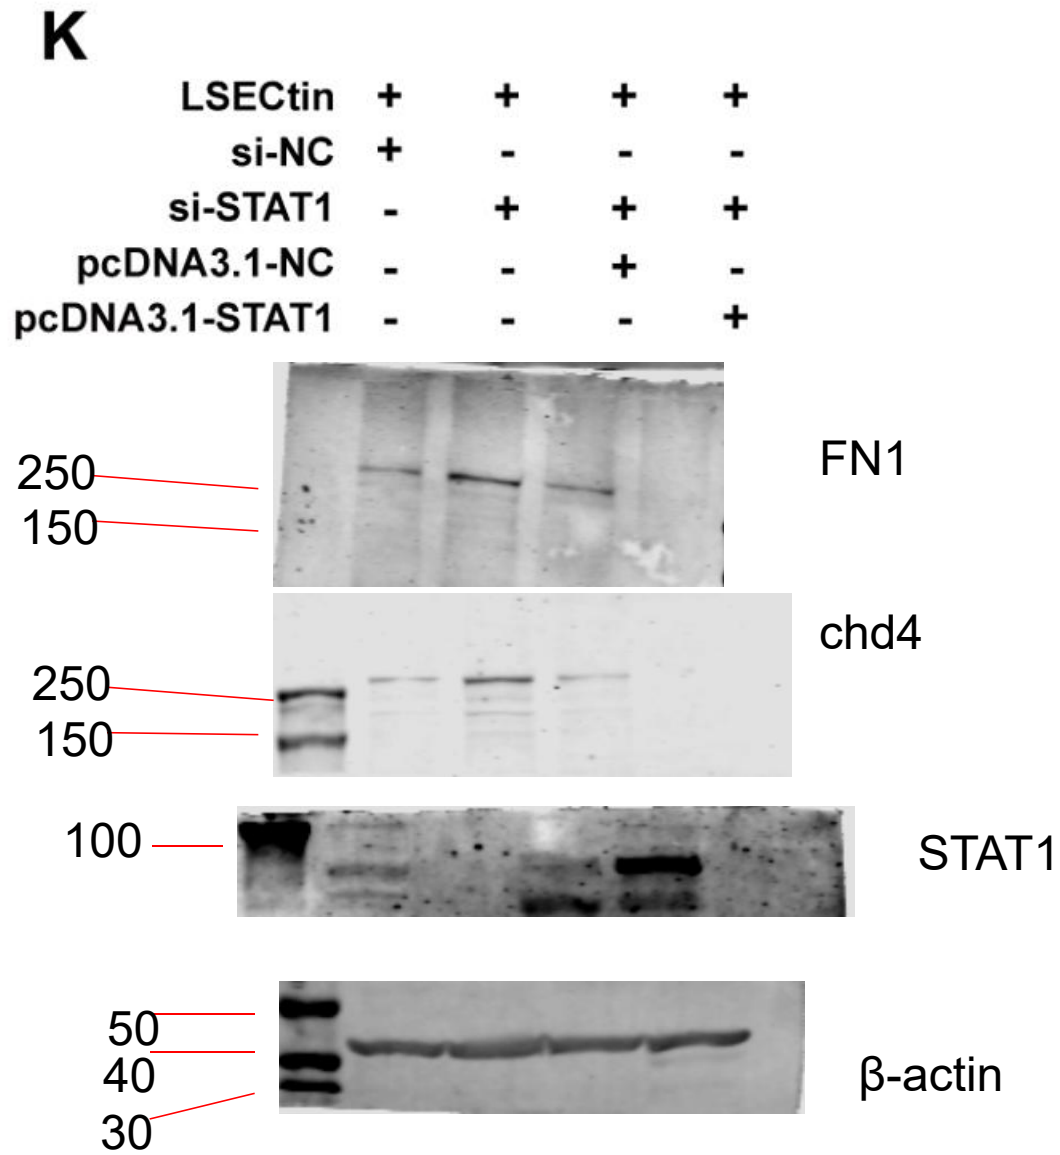

Fig 6

**C**

|                      |   |   |   |   |
|----------------------|---|---|---|---|
| Rb-IgG               | + | - | - | - |
| LSEctin              | - | + | + | + |
| miR-inhibitor-NC     | - | - | + | - |
| miR146a-5p-inhibitor | - | - | - | + |

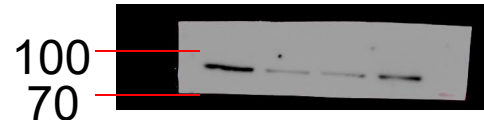

STAT1

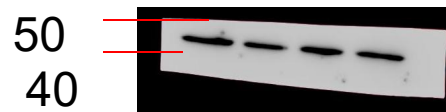

$\beta$ -actin

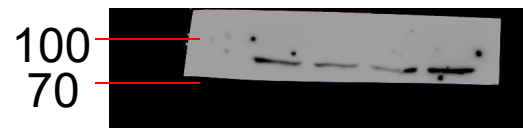

STAT1

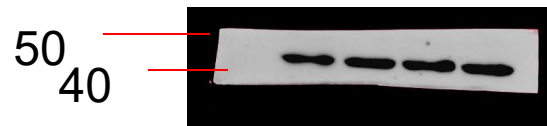

$\beta$ -actin

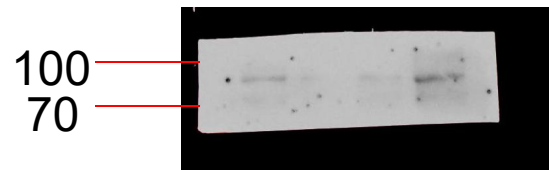

STAT1

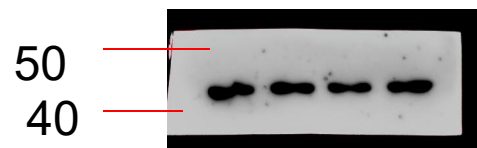

$\beta$ -actin

Fig 6

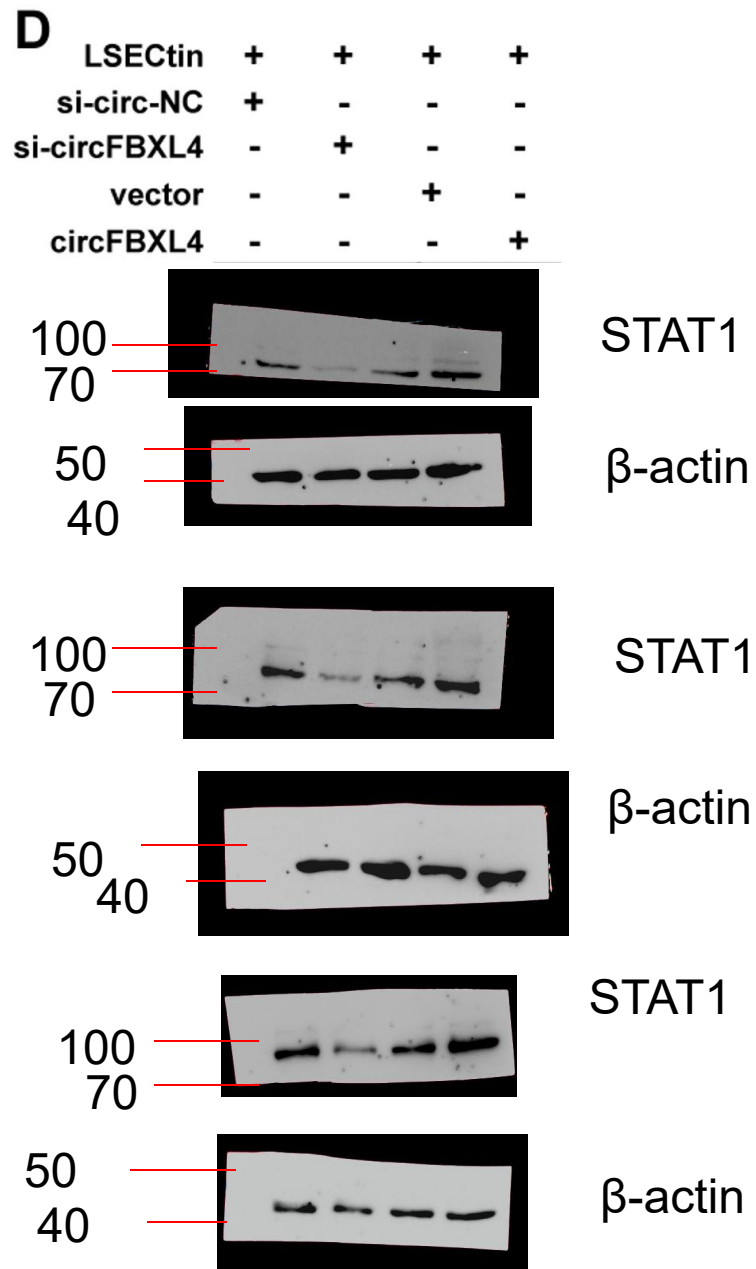

Fig 6

**E**

|                      |   |   |   |   |
|----------------------|---|---|---|---|
| LSEctin              | + | + | + | + |
| si-circ-NC           | + | - | - | - |
| si-circFBXL4         | - | + | + | + |
| miR-inhibitor-NC     | - | - | + | - |
| miR146a-5p-inhibitor | - | - | - | + |

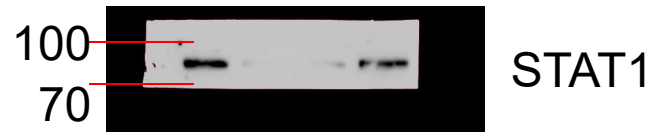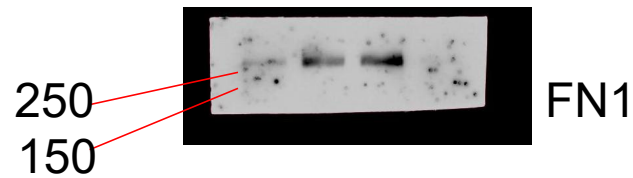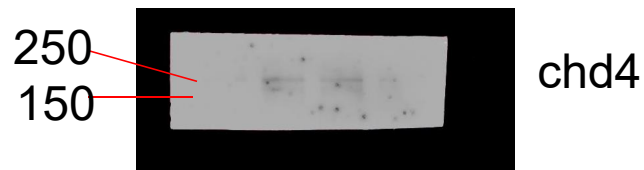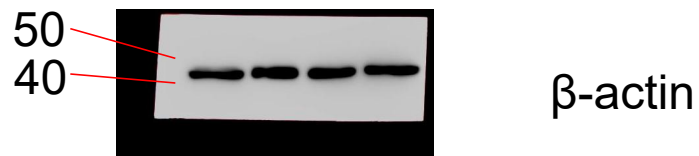

Fig S2

AGS NC 0h 4h 8h 12h

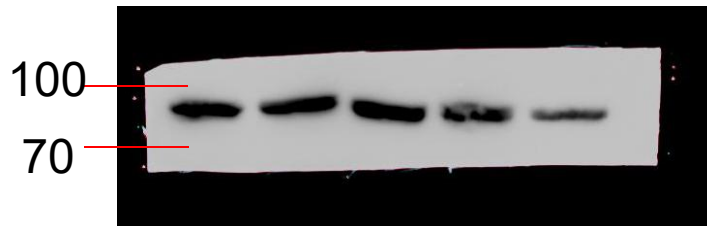

STAT1

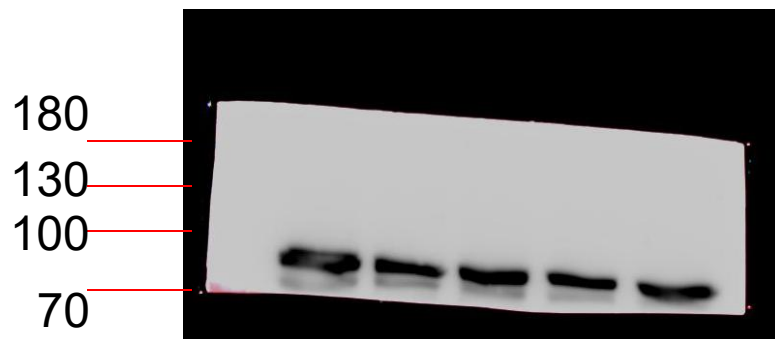

STAT3

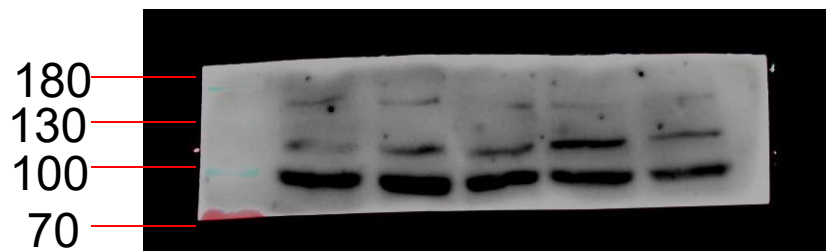

STAT5A

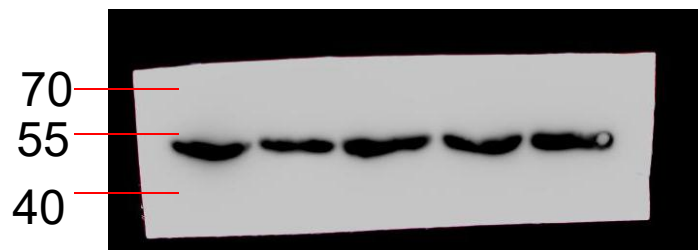

$\beta$ -actin

Fig S2

BGC-823 NC 0h 4h 8h 12h

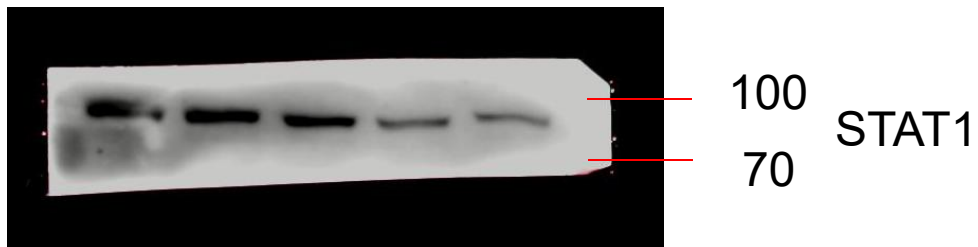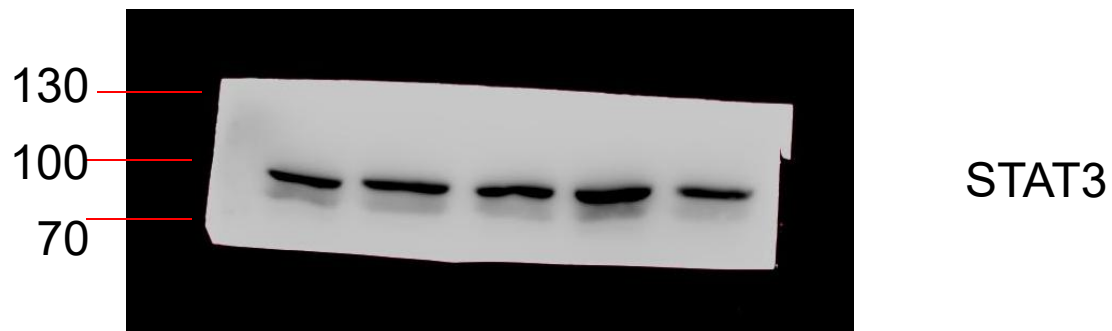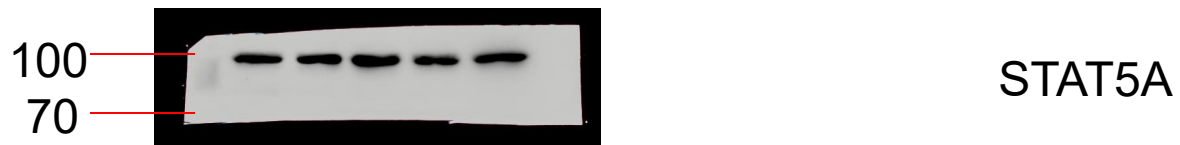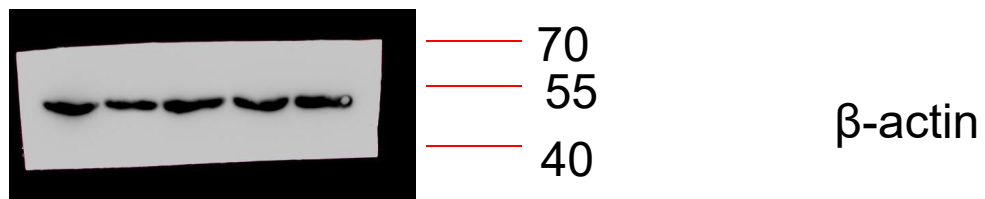

Fig S2

MGC-803 NC 0h 4h 8h 12h

130  
100  
70

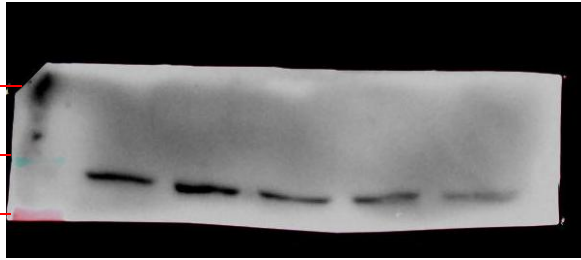

STAT1

100  
70

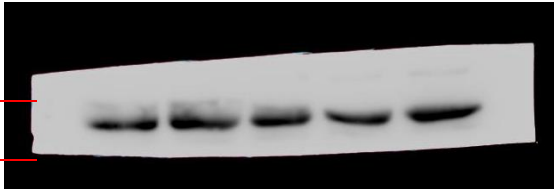

STAT3

100  
70

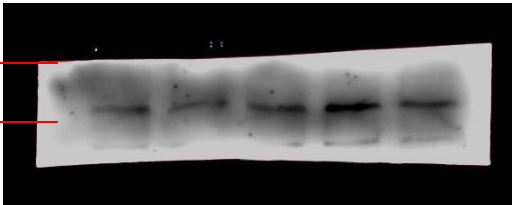

STAT5A

70  
55  
40

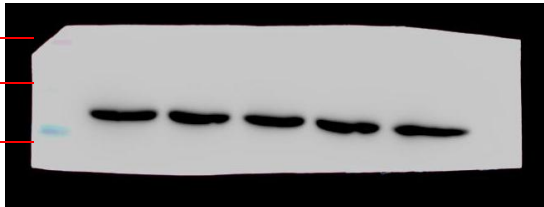

$\beta$ -actin
